# 1 **The 3D enhancer network of the developing T cell genome is controlled by** 2 **SATB1**

3

4 Tomas Zelenka<sup>1,2</sup>, Antonios Klonizakis<sup>1</sup>, Despina Tsoukatou<sup>2</sup>, Sören Franzenburg<sup>3</sup>, Petros Tzerpos<sup>1,4</sup>,

5 Dionysios-Alexandros Papamatheakis<sup>1,2</sup>, Ioannis-Rafail Tzonevrakis<sup>1</sup>, Christoforos Nikolaou<sup>1,2,5</sup>,

6 Dariusz Plewczynski<sup>6</sup>, Charalampos Spilianakis<sup>1,2,#</sup>

7

8 <sup>1</sup> Department of Biology, University of Crete, Heraklion, Crete, Greece

9 <sup>2</sup> Institute of Molecular Biology and Biotechnology—Foundation for Research and Technology Hellas,

10 Heraklion, Crete, Greece

11 <sup>3</sup> University Hospital Schleswig Holstein, Kiel, Germany

12 <sup>4</sup> Department of Biochemistry and Molecular Biology, Faculty of Medicine, University of Debrecen,

13 Debrecen, HU-4032 Hungary (current address)

14 <sup>5</sup> Institute for Bioinnovation, Biomedical Sciences Research Centre "Alexander Fleming," 16672 Vari,

15 Greece (current address)

16 <sup>6</sup> Laboratory of Bioinformatics and Computational Genomics, Faculty of Mathematics and Information

17 Science, Warsaw University of Technology, Warsaw, Poland; Laboratory of Functional and Structural

18 Genomics, Centre of New Technologies, University of Warsaw, Warsaw, Poland

19 # Corresponding author, email: [spiliana@imbb.forth.gr](mailto:spiliana@imbb.forth.gr)

20

21 Tomas Zelenka

22 ORCID: 0000-0003-2753-9754

23 Researcher ID: F-2402-2015

24

25 Charalampos Spilianakis

26 ORCID: 0000-0003-0921-1923

27 Researcher ID: C-9893-2011

28 Ioannis-Rafail Tzonevrakis

29 ORCID: 0000-0003-1356-5900

30

## 31 **Summary**

32 Mechanisms of tissue-specific gene expression regulation via spatial coordination of gene promoters and  
33 distal regulatory elements are still poorly understood. We investigated the 3D genome organization of  
34 developing murine T cells and identified SATB1, a tissue-specific genome organizer, enriched at the  
35 anchors of promoter-enhancer chromatin loops. We assessed the function of SATB1 in T cell chromatin  
36 organization and compared it to the conventional genome organizer CTCF. SATB1 builds a more refined  
37 layer of genome organization upon a CTCF scaffold. To understand the regulatory implications of  
38 SATB1 loopscape structure, we generated *Satb1<sup>fl/fl</sup>Cd4-Cre<sup>+</sup>* (*Satb1* cKO) conditional knockout animals  
39 which suffered from autoimmunity. We aimed to identify molecular mechanisms responsible for the  
40 deregulation of the immune system in *Satb1* cKO animals. H3K27ac HiChIP and Hi-C experiments  
41 indicated that SATB1 primarily mediates promoter-enhancer loops affecting master regulator genes  
42 (such as *Bcl6*), the T cell receptor locus and adhesion molecule genes, collectively being critical for cell  
43 lineage specification and immune system homeostasis. Our findings unravel the function of a tissue-  
44 specific factor that controls transcription programs, via spatial chromatin arrangements complementary  
45 to the chromatin structure imposed by ubiquitously expressed genome organizers.

46

47 **Keywords:** SATB1, CTCF, enhancers, T cells, thymocytes, nuclear matrix, chromatin organization,  
48 adaptive immunity, Hi-C, HiChIP, *Bcl6*, TCR.

## 49 **Introduction**

50 In order to store the large amount of genetic information, higher eukaryotes developed spatial and  
51 functional genome organization into compartments and domains. The A and B compartments represent  
52 the largest organizational units and they functionally correspond to active and inactive chromatin regions,  
53 respectively (Lieberman-Aiden et al., 2009; Rao et al., 2014). These compartments are further partitioned  
54 into topologically associated domains (TADs; Dixon et al., 2012; Nora et al., 2012), although due to their  
55 heterogeneous nature, new terminology better reflecting the reality is slowly being adopted (Rowley and  
56 Corces, 2018). Structural segmentation of chromatin in mammals is driven by architectural proteins such  
57 as CTCF and the cohesin complex (Nora et al., 2017; Rao et al., 2017; Schwarzer et al., 2017). Depletion  
58 of either CTCF (Nora et al., 2017), cohesin (Rao et al., 2017) or its loading factor *Nipbl* (Schwarzer et  
59 al., 2017) leads to global disruption of TAD organization, yet surprisingly with only modest  
60 transcriptional changes and unaffected A/B compartments. This, together with the recent findings at base-  
61 pair resolution (Hua et al., 2021), indicates the presence of additional mechanisms of the three-  
62 dimensional (3D) chromatin organization. The elimination of cohesin loading factor *Nipbl* unveiled a  
63 finer compartment structure that reflected the underlying epigenetic landscape (Schwarzer et al., 2017).  
64 This observation is in line with the model in which the primary driver of chromatin organization is the  
65 actual transcriptional state (Rowley et al., 2017). Indeed, RNA polymerase II and transcription itself are  
66 tightly linked to the formation of finer-scale structures of chromatin organization (Hsieh et al., 2020).  
67 Nonetheless, transcriptional inhibition has only a modest effect on promoter-enhancer contacts (Hsieh et  
68 al., 2020). Similarly, the inhibition of BET proteins, degradation of BRD4 or dissolution of  
69 transcriptional phase condensates all yield in the disrupted transcription, however they also have just a  
70 little impact on promoter-enhancer interactions (Crump et al., 2021). In contrast, an experimental  
71 disruption of TADs (Lupiáñez et al., 2015) or direct manipulation of promoter-enhancer contacts (Deng  
72 et al., 2012) both result in alterations of gene expression. Additionally, chromatin reorganization often  
73 precedes changes in transcription during development and differentiation (Apostolou et al., 2013;

74 Stadhouders et al., 2018), suggesting that in many scenarios 3D genome organization instructs the  
75 transcriptional programs. However, the precise mechanisms on how chromatin organization is linked to  
76 gene expression regulation, especially in the context of cell lineage specification, still remain poorly  
77 understood. Several transcription factors have been shown to mediate promoter-enhancer interactions  
78 and thus also the underlying transcriptional programs in a tissue-specific manner and often even  
79 independent of CTCF and cohesin (Giammartino et al., 2020; Kim and Shendure, 2019; Stadhouders et  
80 al., 2019). Such an additional regulatory layer of chromatin organization, provided by transcription  
81 factors, may represent the missing link between high order chromatin structure and transcriptional  
82 regulation.

83 In this work, we aimed to identify drivers of regulatory chromatin loops in developing murine T  
84 cells, as a great model of tissue-specific gene expression regulation. We have identified SATB1, a factor  
85 exhibiting enriched occupancy at gene promoters and enhancers involved in long-range chromatin  
86 interactions. SATB1 has been attributed to many biological roles, mostly during T cell development  
87 (Zelenka and Spilianakis, 2020), but it also regulates the function of cell types such as the epidermis  
88 (Fessing et al., 2011) and neurons (Balamotis et al., 2012; Denaxa et al., 2012). Moreover, SATB1 is  
89 also overexpressed in a wide array of cancers and is positively associated with increased tumour size,  
90 metastasis, tumour progression, poor prognosis and reduced overall survival (Sunkara et al.,  
91 2018). Originally described as a Special AT-rich Binding protein (Dickinson et al., 1992), it is known  
92 for its propensity to bind DNA regions with more negative torsional stress (Ghosh et al., 2019). In a  
93 proposed model, SATB1 dimers bound to DNA interact with each other to form a tetramer in order to  
94 mediate long-range chromatin loops (Wang et al., 2012, 2014). The regulatory function of SATB1 is  
95 controlled by post-translational modifications (Kumar et al., 2006) and indirectly also by protein-protein  
96 interactions with chromatin modifying complexes (Fujii et al., 2003; Jangid et al., 2014; Kumar et al.,  
97 2005; Purbey et al., 2009; Yasui et al., 2002).

98 To understand the principles of chromatin organization in murine thymocytes and their impact  
99 on physiology, we performed Hi-C and HiChIP experiments and compared the roles of tissue-specific  
100 SATB1 and ubiquitously expressed CTCF genome organizers. Our findings were complemented by  
101 ATAC-seq, RNA-seq and H3K27ac HiChIP experiments in WT and *Satb1* cKO thymocytes to further  
102 unravel the functional roles of SATB1. This represents a comprehensive genome-wide study,  
103 systematically probing all SATB1-mediated chromatin loops in the T cell nucleus. A number of datasets  
104 combined with unbiased analytical approaches indicated the presence of a functional organizational layer  
105 built upon a general chromatin scaffold mediated by conventional genome organizers, such as CTCF,  
106 specifically regulating expression of master regulator genes and adhesion molecule genes essential for  
107 proper T cell development.

## 108 **Results**

### 109 **Detection of regulatory chromatin loops in T cells**

110 In order to unravel the active promoter-enhancer connectome in T cells, we performed H3K27ac HiChIP  
111 experiments (Mumbach et al., 2016) in C57BL/6J (WT) thymocytes. Loop calling at 5 kbp resolution  
112 ( $FDR \leq 0.01$ ) yielded 16,458 regulatory loops. To identify the prospective protein factors associated with  
113 these regulatory loops, we intersected the anchors of these loops with all the available murine ChIP-seq  
114 datasets from blood cells, using the enrichment analysis of ChIP-Atlas (Oki et al., 2018). The most highly  
115 enriched protein factors included RAG1, RAG2, BCL11b, SATB1 and TCF1 (Figure 1A). Both RAG1/2  
116 proteins are known to be associated with the H3K27ac histone modification (Maman et al., 2016; Teng  
117 et al., 2015), however their main known role relies in the recombination of B and T cell receptor loci  
118 (Fugmann et al., 2000). BCL11b and TCF1 are well-studied factors specifying T cell lineage  
119 commitment, whose roles in forming the chromatin landscape in T cells have been recently addressed  
120 (Emmanuel et al., 2018; Garcia-Perez et al., 2020; Hu et al., 2018; Johnson et al., 2018). We drew our  
121 attention to SATB1, which displayed significant enrichment at the H3K27ac loop anchors (Figure 1B)

122 and also represents a known genome organizer (Cai et al., 2003, 2006), yet with a limited number of  
123 genome-wide studies targeting its role in 3D chromatin organization of T cells.

#### 124 **The ablation of SATB1 from murine T cells leads to autoimmunity**

125 In order to link the molecular mechanisms governing T cell chromatin organization to physiology, we  
126 generated a *Satb1*<sup>fl/fl</sup>*Cd4-Cre*<sup>+</sup> (*Satb1* cKO) conditional knockout mouse and characterized its phenotype.  
127 The knockout animals displayed problems with their skin and fur, inflammation in various tissues and  
128 affected lymphoid organs (Figure S1A). The thymi of *Satb1* cKO animals were smaller in size, unlike  
129 their enlarged peripheral lymphoid organs. Thymic deregulation was also reflected in the impaired  
130 developmental processes in the thymus as demonstrated by the deregulation of T cell populations (Figure  
131 1C and S1B). The increased number of CD4<sup>+</sup>CD8<sup>+</sup> (double positive - DP) cells and the decreased  
132 numbers of CD4<sup>+</sup> and CD8<sup>+</sup> single positive (SP) cells in the thymus of *Satb1* cKO mice indicated a  
133 developmental blockade at the DP stage, pointing to altered positive selection as previously suggested  
134 (Alvarez et al., 2000; Kondo et al., 2016). Moreover, there was a diminished pool of naïve  
135 CD62L<sup>hi</sup>CD44<sup>lo</sup> peripheral T cells and an increased fraction of CD44<sup>hi</sup> T cells displaying an activated  
136 (and/or memory) T cell phenotype (Figure 1C). Deregulation of the thymic developmental programs was  
137 also supported by the altered cytokine milieu in the blood serum, with prevailing IL-17 cell responses  
138 and increased levels of pro-inflammatory cytokines such as IFN $\gamma$  and TNF $\alpha$  detected in *Satb1* cKO sera  
139 (Figure 1D). The increased levels of DP T cells in the spleen (Figure 1C), together with the absence of  
140 naïve CD4<sup>+</sup> T cells were suggestive of an autoimmune-like phenotype (Sakaguchi et al., 2008). Indeed,  
141 we observed infiltration of T cells in the pancreas of the *Satb1* cKO animals, causing damage to the islets  
142 of Langerhans and leading to impaired glucose metabolism (Figure 1E). The deregulation of cellular  
143 immunity was accompanied by the presence of autoantibodies, which we demonstrated by incubating  
144 sections of WT pancreas with *Satb1* cKO sera (Figure 1F) and *Satb1* cKO sections of pancreas and lungs  
145 with *Satb1* cKO sera (Figure S1C). Based on these findings, we concluded that SATB1 absence leads to

146 impaired thymocyte development and the concomitant deregulation of T cell populations in the  
147 secondary lymphoid organs, affecting T cell homeostasis and sustaining an autoimmune-like phenotype.

#### 148 **Roles of SATB1 and CTCF in T cell chromatin organization**

149 SATB1 has been previously attributed with genome organizing functions (Cai et al., 2003, 2006),  
150 therefore we aimed to investigate the potential deregulation of thymocyte genome organization that is  
151 anticipated upon SATB1 depletion and link it to the deregulation of immune physiology we observed in  
152 the *Satb1* cKO mice. For this purpose, we performed Hi-C experiments (Lieberman-Aiden et al., 2009)  
153 in both WT and *Satb1* cKO thymocytes (Table S1). We did not identify any major changes in high-order  
154 chromatin organization (Figure 2A). Differential analysis of topologically associating domains (TADs)  
155 between WT and *Satb1* cKO cells also supported this claim with an average of 77% unchanged TADs  
156 between WT and *Satb1* cKO, resembling the level of differences being usually detected between the  
157 different biological replicates of the same experiment (Figure S1D; Dixon et al., 2012; Rao et al., 2014;  
158 Sauerwald et al., 2020). Even though broad scale differences were not observed in the Hi-C maps, one  
159 may interrogate more localized conformational changes with HiChIP data, especially given our  
160 underlying hypothesis of transcription factor-guided genome organization. Therefore, we next compared  
161 the SATB1-mediated and CTCF-mediated chromatin loops by performing HiChIP experiments targeting  
162 the respective factors in WT cells. Our HiChIP datasets at 5 kbp resolution ( $FDR \leq 0.01$ ) yielded 1,374  
163 and 3,029 loops for SATB1 and CTCF, respectively (Table S1, S2). It is important to note that in the  
164 SATB1 HiChIP experiments we used custom-made antibodies specifically targeting the long SATB1  
165 isoform that we recently characterized (Zelenka et al., Submitted; Table S3). We compared differentially  
166 interacting areas of the HiChIP matrices at 100 kbp and 500 kbp resolution (Figure 2B). At 100 kbp  
167 resolution, 46 interaction pairs were stronger in the SATB1 contact matrix compared to 553 in the CTCF  
168 matrix ( $FDR \leq 0.05$ ). The analysis at 500 kbp resolution indicated a similar disproportion (7 vs 42),  
169 collectively suggesting that CTCF contributes to the high-order chromatin organization in developing T  
170 cells to a much higher extent than SATB1. Next, we performed aggregate peak analysis (APA; Rao et



171 al., 2014) applying the SATB1/CTCF-mediated HiChIP loops on Hi-C datasets derived from WT and  
172 *Satb1* cKO thymocytes. As expected, this analysis unraveled diminished interactions for the SATB1-  
173 mediated loops in the *Satb1* cKO cells compared to WT, but no change was evident for the CTCF-  
174 mediated loops (Figure S1E). Together with the unchanged RNA levels of *Ctcf* in the *Satb1* cKO, this  
175 suggested that CTCF was capable of maintaining the high-order chromatin structure in the *Satb1* cKO  
176 cells. Moreover, genes residing in both CTCF- and SATB1-mediated loops were transcriptionally  
177 insulated from their gene neighbors (Figure S1F) and this characteristic was not altered in the *Satb1* cKO.  
178 The latter was not surprising since out of 1,374 SATB1-mediated loops, the vast majority (84%)  
179 overlapped with at least one CTCF-mediated loop (Figure 2C). An overlap score, calculated by dividing  
180 the length of the overlap by the total size of a loop, indicated that most of SATB1-mediated loops were  
181 engulfed within CTCF loops (Figure 2D). As CTCF is a well-characterized protein with insulator  
182 function (Phillips and Corces, 2009), it is likely that the transcriptional insulation effect of SATB1 was  
183 derived from the CTCF function. Nevertheless; the binding pattern of these factors was quite different.  
184 Similar to previously published results (Ghosh et al., 2019), the SATB1 binding sites we have identified,  
185 evinced a nucleosome preference, unlike CTCF (Figure 2E). Gene ontology analysis of the genes  
186 intersecting with loop anchors uncovered the high propensity of SATB1 to participate in the loopscape  
187 structure of immune-related genes, while CTCF-mediated chromatin loops exhibited omnipresent  
188 looping patterns resulting in the enrichment of general metabolic and cellular processes (Figure 2F).  
189 Taking these results under consideration we conclude that the high-order chromatin organization of  
190 murine thymocytes is primarily maintained via CTCF long-range chromatin interactions with minor input  
191 from the SATB1-mediated loops.

## 192 **The regulatory role of SATB1-mediated chromatin loops in murine T cells**

193 To unravel the regulatory potential of SATB1-mediated chromatin loops we investigated the impact of  
194 SATB1 depletion in *Satb1* cKO thymocytes. These cells generally appeared to have more compact  
195 chromatin as demonstrated by several measures. Immunofluorescence experiments displayed more

196 intense HP1 $\alpha$  staining (marker of heterochromatin) in *Satb1* cKO thymocytes (Figure 3A). Despite the  
197 gross similarities at the higher order chromatin structure between WT and *Satb1* cKO cells, as deduced  
198 by Hi-C, we have detected 1.11% of chromosome compartments that turned from compartment A  
199 (predominantly consisting of euchromatin) to compartment B (heterochromatin regions; Lieberman-  
200 Aiden et al., 2009) in the *Satb1* cKO cells, compared to 0.59% of B to A compartment switch (Figure  
201 S1G). Genes affected by the aforementioned A-to-B compartment switch did not display any gene  
202 ontology pathway enrichment which would otherwise be indicative of a link between high-order  
203 chromatin structure and the deregulated immune system in *Satb1* cKO animals. This observation further  
204 reinforced our hypothesis that SATB1 acts at a finer-scale level of genome organization. In addition,  
205 *Satb1* cKO cells evinced a higher fraction of less accessible regions (6,389 compared to 5,114 more  
206 accessible regions;  $p \leq 0.01$ ) based on ATAC-seq analysis performed for WT and *Satb1* cKO thymocytes  
207 (Figure S1H; Table S4). To determine whether these chromatin accessibility changes were also reflected  
208 at the transcriptional level, we performed stranded total RNA sequencing. Our analysis revealed that 922  
209 genes were significantly underexpressed and 719 genes were significantly overexpressed in the *Satb1*  
210 cKO compared to WT thymocytes (FDR<0.05; Table S5). Such a strong deregulation of the  
211 transcriptional landscape in *Satb1* cKO cells in contrast to the modest transcriptional changes observed  
212 upon depletion of conventional genome organizers (Nora et al., 2017; Rao et al., 2017; Schwarzer et al.,  
213 2017) emphasizes the regulatory importance of SATB1-dependent chromatin organization.

214 SATB1 is known for its functional ambiguity of acting either as a transcriptional activator or a  
215 repressor, depending on the cellular context (Kumar et al., 2006). Although the original studies were  
216 mainly focused on its repressive roles (Kohwi Shigematsu et al., 1997; Liu et al., 1997; Seo et al., 2005),  
217 our aforementioned observations supported the increased chromatin compactness and subsequent  
218 repressed environment of the SATB1-depleted cells. This rather indicated its positive impact on  
219 transcriptional gene regulation. The vast majority of SATB1 binding sites in WT thymocytes evinced  
220 increased chromatin accessibility compared to randomly shuffled binding sites (i.e. what would be

221 expected by chance, 100 randomizations used, bootstrap p-value = 0; Figure 3B), with a visible drop in  
222 chromatin accessibility in the *Satb1* cKO (Figure 3C). This drop in chromatin accessibility in *Satb1* cKO  
223 cells was especially evident at the transcription start site of genes (TSS), suggesting a direct role of  
224 SATB1 in gene transcription regulation (Figure 3D and S1I). Moreover, the expression changes of  
225 significantly deregulated genes were positively correlated with the changes of chromatin accessibility at  
226 promoters determined by ATAC-seq (Spearman's  $\rho = 0.438$ ,  $P < 2.22e-16$ ; Figure S1J). Only about 5%  
227 of SATB1 binding sites had low chromatin accessibility in WT (lower than the average accessibility  
228 score of ten randomizations depicted in Figure 3B). These regions had increased chromatin accessibility  
229 in the *Satb1* cKO (Figure S1K), which would suggest a repressive function of SATB1. However, these  
230 regions were not enriched for immune-related genes (not shown) and thus probably not contributing to  
231 the observed phenotype.

232 We have next created a linear regression model, as an unbiased way to identify how gene  
233 expression was affected in murine thymocytes upon SATB1 depletion. We utilized SATB1 binding,  
234 SATB1- and CTCF-mediated chromatin loops, changes in H3K27ac-dependent chromatin loops and  
235 changes in chromatin accessibility at different positions of a gene, as predictors of RNA level changes  
236 between WT and *Satb1* cKO cells. We found that the majority of predictors exhibited an expected  
237 behavior, such as increased chromatin accessibility at gene promoters was associated with increased gene  
238 expression (Figure S2). The regression model highlighted SATB1 binding and SATB1-mediated  
239 chromatin loops as good predictors associated with decreased RNA levels of influenced genes in the  
240 *Satb1* cKO. In this analysis, we applied the model for all known genes, which resulted in a quite low R-  
241 squared value (0.113). For this reason, we verified the activatory role of SATB1 loops with an additional  
242 approach. We constructed an inference tree, where we systematically probed the distribution of gene  
243 expression for the genes that were or were not found in SATB1-mediated loops (Figure 3E). Genes  
244 located in SATB1-mediated loops displayed lower RNA levels in the *Satb1* cKO, an effect that was

245 further intensified when the gene was connected to an enhancer (Figure 3E), suggesting a positive role  
246 for SATB1 in gene transcription via promoter-enhancer mediated chromatin loops.

247 Thymic enhancers were previously shown to be occupied by conventional genome organizers  
248 such as CTCF and cohesin, suggesting their involvement in gene regulatory loops of thymocytes (Ing-  
249 Simmons et al., 2015; Seitan et al., 2013). We utilized a list of predicted thymic enhancers (Shen et al.,  
250 2012) and we found more than 2-fold enrichment of SATB1- over CTCF-mediated loops overlapping  
251 with such enhancers (Figure S1L) and more than 3-fold enrichment of genes connected to enhancers by  
252 SATB1-mediated chromatin loops over CTCF-mediated loops (Figure 3F). SATB1-mediated loops  
253 connected to enhancers, also displayed a disturbed chromatin interaction pattern in *Satb1* cKO Hi-C data  
254 compared to WT (Figure 3G). Collectively, these findings suggested that CTCF participates in  
255 mechanisms responsible for supporting a basal high-order T cell chromatin structure, whereupon SATB1  
256 likely exerts its action in a more refined organization layer consisting of promoter-enhancer chromatin  
257 loops.

### 258 **Deregulated promoter-enhancer loops in *Satb1* cKO T cells**

259 To further investigate the latter hypothesis, we compared the promoter-enhancer chromatin loops present  
260 in WT and *Satb1* cKO thymocytes, utilizing the H3K27ac HiChIP loops. H3K27ac HiChIP in *Satb1* cKO  
261 thymocytes yielded 19,498 loops (compared to 16,458 loops detected in WT; Table S1, S2). Differential  
262 analysis of the 3D interactions (independent on the 1D H3K27ac ChIP-seq signal) identified 11,540 and  
263 12,111 H3K27ac loops displaying decreased or increased contact enrichment in the *Satb1* cKO compared  
264 to WT cells, respectively (further referred as “underinteracting” and “overinteracting” H3K27ac loops,  
265 respectively; Table S6). The RNA levels of the genes associated with differential H3K27ac chromatin  
266 loops in WT versus *Satb1* cKO displayed a positive correlation (Spearman’s  $\rho = 0.26$ ) with the difference  
267 between over- and under-interacting H3K27ac loops (Figure 4A). The SATB1-mediated  
268 underinteracting H3K27ac loops displayed the highest drop in the RNA levels of the overlapping genes  
269 compared to those in non-SATB1 underinteracting H3K27ac loops (Figure 4B). In contrast, the genes

270 localized in anchors of overinteracting H3K27ac loops did not show any major changes in expression  
271 (Figure 4C). Moreover, the expression of genes located at anchors of SATB1-mediated loops was  
272 decreased more dramatically than genes located at CTCF loops (Figure 4B). This finding is a good  
273 indication of causality, supporting direct involvement of SATB1 in the regulatory chromatin loops.

274 Next, we sought to investigate the genes intersecting with anchors of the differential H3K27ac  
275 loops. Underinteracting H3K27ac loops, with the highest score, included genes encoding for master  
276 regulators and T cell signature genes such as *Bcl6*, *Ets2*, *Tcf7*, *Cd8b1*, *Ikzf1*, *Bach2*, *Cd6*, *Rag2*, *Il4ra*,  
277 *Rag1*, *Lef1* and others (in descending order; Table S6), which all evinced decreased RNA levels in the  
278 *Satb1* cKO. On the other hand, the overinteracting H3K27ac loops with the highest score also contained  
279 factors essential for proper T cell development and differentiation such as *Tox*, *Gata3*, *Ifngr1*, *Maf* and/or  
280 *Jun* (Table S6), which all correspondingly displayed increased gene expression in the *Satb1* cKO  
281 thymocytes. Certain genes present in the overinteracting H3K27ac loops were bound by SATB1 and a  
282 fraction of them were also found in SATB1-mediated loops. Thus, we cannot exclude the possibility that  
283 SATB1 mediates a repressive role for these targets. Though, since our unbiased approaches have  
284 primarily suggested an activatory role for the SATB1-mediated loops, in this work we focused on this.

### 285 **SATB1 positively regulates *Bcl6* and other master regulator genes**

286 The most highly affected candidate gene, in terms of H3K27ac underinteracting loops in the *Satb1* cKO  
287 compared to WT, was *Bcl6*. The expression of *Bcl6* gene in B cells is regulated by a set of super-  
288 enhancers; one spanning the promoter and 5' UTR region, and additional three distal upstream enhancer  
289 stretches at 150-250 kbp, ~350 kbp and at ~500 kbp (Chapuy et al., 2013; Qian et al., 2014;  
290 Ramachandrareddy et al., 2010; Ryan et al., 2015). Apart from H3K27ac differential loops, we identified  
291 increased SATB1-mediated interactions in the locus with two significant SATB1-mediated loops  
292 connecting *Bcl6* and the super-enhancer regions at ~250 kbp and ~500 kbp upstream of the gene (Figure  
293 4D; here referred to as SE1 and SE2, respectively). These enriched chromatin interactions observed in  
294 WT were absent in the *Satb1* cKO thymocytes as deduced by Hi-C experiments (red arrows). As a result

295 of this deregulation, the *Bcl6* gene displayed significantly lower RNA levels in the *Satb1* cKO  
296 thymocytes ( $\log_2FC = -1.290$ ,  $FDR = 5.6E-10$ ). Next, we utilized this gene locus as an example for 3D  
297 modeling experiments. Initially, we utilized our CTCF and SATB1 HiChIP data and performed  
298 computational modeling which supported the idea that SATB1-mediated chromatin landscape  
299 represented a regulatory layer, built on a generic scaffold mediated by other factors, at least partly by  
300 CTCF (Figure S3A). 3D modeling based on Hi-C data allowed us to better visualize the differences in  
301 the proximity between *Bcl6* and its super-enhancers in WT and *Satb1* cKO cells (Figure 4E). To further  
302 support the functional significance of these interactions, we overlaid these models with ChIP-seq data  
303 for the histone modifications H3K27ac, H3K4me1 and H3K4me3 from WT cells (Figure S3B). These  
304 models showed that active enhancers decorated by H3K27ac and H3K4me1 were located in spatial  
305 proximity to *Bcl6* gene in WT and not in *Satb1* cKO cells. It is worth noting that 1D H3K27ac ChIP-seq  
306 peaks derived from HiChIP experiments available for WT and *Satb1* cKO did not reveal any major  
307 differences between the genotypes, which further reinforces the importance of SATB1-mediated 3D  
308 chromatin organization regulating *Bcl6* expression. 3D modeling, based on thymocyte Hi-C datasets,  
309 allowed us to untangle the potential presence of discrete cell subpopulations. In WT animals, we  
310 identified two subpopulations of cells differing in the proximity between *Bcl6* and its super-enhancers  
311 (Figure S3C); yet no significant subpopulation formation was detectable in the *Satb1* cKO. BCL6 is the  
312 master regulator of Tfh cell lineage specification during the differentiation of naive CD4 cells into Tfh  
313 cells (Johnston et al., 2009; Nurieva et al., 2009; Yu et al., 2009). However, it is also expressed in  
314 developing thymocytes (Hyjek et al., 2001; Sun et al., 2000) where it was shown to form a complex with  
315 E3 ubiquitin ligase CUL3 and exert a negative feedback loop on the Tfh program by repressing *Batf* and  
316 *Bcl6* (Mathew et al., 2014). Thus, we speculated that the different subpopulations identified in our 3D  
317 modeling may be linked to the different developmental T cell fates, where Tfh precursor cells would  
318 differ from other cell type precursors by the distance between *Bcl6* and its super-enhancers. In support  
319 to the connection between SATB1-mediated regulation and Tfh lineage specification, we demonstrated

320 that *Satb1* cKO animals had disturbed germinal centers (Figure 4F), which translated into the production  
321 of autoantibodies (Figure 1F and S1C).

322 Apart from *Bcl6*, more genes (depicted in Table S6) were also regulated by the SATB1-mediated  
323 chromatin organization which are quite important for the function of the immune system. Genomic tracks  
324 and SATB1-mediated HiChIP loops for such selected genes (*Tcf7*, *Lef1*, *Cd8*, *Ikzf1*, *Satb1*) are presented  
325 in Figure S4.

### 326 **T cell receptor locus and cell adhesion in *Satb1* cKO**

327 We should note that in the differential analysis of H3K27ac loops, short genes could be underestimated,  
328 hence we further considered gene length in our analysis. Indeed, upon taking this into account, the most  
329 affected genes in both categories of overinteracting and underinteracting loops were enriched for gene  
330 segments of the T cell receptor (TCR) locus (Table S6).

331 TCR is the most important cell surface receptor expressed in thymocytes which defines multiple  
332 developmental decisions. The generation of a functional TCR involves recombination of the variable  
333 (V), diversity (D) and joining (J) gene segments via a process called V(D)J recombination. This process  
334 is based upon the action of protein complexes that include RAG1 and RAG2 recombinases (Fugmann et  
335 al., 2000). Recruitment of RAG proteins is highly correlated with active promoters labeled with  
336 H3K4me3 (Ji et al., 2010; Teng et al., 2015) and also with enhancers and regions decorated by the  
337 H3K27ac mark (Maman et al., 2016; Teng et al., 2015). Moreover, recombination is regulated by the 3D  
338 organization of the locus driven by the architectural proteins CTCF and cohesin, mainly via the  
339 arrangement of specific TCR enhancers (Chen et al., 2015; Seitan et al., 2011; Shih et al., 2012).

340 Here, we revealed a number of SATB1-mediated loops connecting the TCR $\alpha$  enhancer with inner  
341 regions of the locus (Figure 5A). Moreover; a number of highly significant SATB1 loops split the region  
342 of joining gene segments into two parts – one part containing gene segments that were overexpressed  
343 and the other half containing gene segments that were underexpressed in the *Satb1* cKO. This resulted in  
344 the defective usage of the TCR $\alpha$  joining segments (Figure 5A), coupled with the overall *Tcra*

345 rearrangement in *Satb1* cKO animals as previously reported (Feng et al., 2021; Hao et al., 2015). A  
346 previous study ascribed this deregulation to the lost SATB1-mediated regulatory loops, positively  
347 controlling the expression of both *Rag1/Rag2* genes resulting in lower levels of RAG proteins (Hao et  
348 al., 2015). We validated the presence of these regulatory loops (Figure 5B) as well as the resulting 2-fold  
349 and 2.8-fold decrease in thymic RNA levels of the *Rag1* and *Rag2* genes (Figure 5C), respectively (which  
350 was less profound in sorted DP cells: 1.34-fold and 1.61-fold decrease for *Rag1* and *Rag2* genes,  
351 respectively; data not shown). However, given the long turnover of RAG proteins, their thymic protein  
352 levels were not significantly affected (Figure 5D). Moreover, the representation of *Traj* fragments was  
353 correlated with the presence of overinteracting and underinteracting H3K27ac loops (Figure 5E),  
354 indicating the importance of 3D chromatin organization of the TCR locus in its rearrangements.

355         Apart from the deregulation of H3K27ac chromatin loops in *Satb1* cKO compared to WT  
356 thymocytes, as deduced by HiChIP experiments we should also note that the “cell adhesion pathway”  
357 was overrepresented in gene ontology analysis for both underexpressed genes by RNA-seq and genes  
358 associated with less accessible regions as deduced by ATAC-seq (Figure 6A; gene ontology pathways  
359 for other genomic datasets are presented in Figure S5). Indeed, genes encoding key molecules for  
360 intrathymic crosstalk (Lopes et al., 2015) were underexpressed in the *Satb1* cKO (Figure 6B). In addition  
361 to the deregulated loopscape structure of the TCR $\alpha$  gene locus, we identified similar defects in the  
362 SATB1-mediated regulatory looping for adhesion molecule gene loci such as *Cd28* (Figure 6C), *Lta*, *Ltb*  
363 (Figure S6A) and *Ccr7* (Figure S6B). Total thymocyte RNA sequencing revealed the downregulation in  
364 expression levels of receptors specific for the medullary thymic epithelial cells (Figure 6B). In support  
365 of this finding, we also identified the disrupted thymic structure and impaired cell-to-cell communication  
366 in the *Satb1* cKO thymus. This deregulation was notable from several histological and electron  
367 microscopy experiments indicating disrupted cellular contacts in *Satb1* cKO (Figure 6D). As a result, the  
368 thymi of *Satb1* cKO animals contained a lower number of cells (Figure 6E), partly due to the increased



369 apoptosis rate (Figure 6F) resulting from the impaired developmental pathways and partly due to the  
370 increased exit rate of these improperly developed T cells from the thymus (Figure 6G).

## 371 **Discussion**

372 The adaptive immune response relies on the accurate developmental coordination of several alternative  
373 cell lineage fates. 3D genome organization in T cells represents a crucial denominator for this  
374 coordination (Spilianakis and Flavell, 2004; Spilianakis et al., 2005). In this work, we described the  
375 regulatory chromatin network of developing T cells and identified SATB1 protein being enriched at the  
376 anchors of regulatory chromatin loops. We performed a systematic genome-wide analysis of SATB1  
377 roles in T cells. First, we compared the chromatin organization role of SATB1, to that of the conventional  
378 genome organizer CTCF. Utilizing a plethora of research approaches, we demonstrated that SATB1  
379 establishes a finer-scale organizational layer, built upon the pre-existing scaffold mediated by other  
380 architectural proteins. Depletion of conventional genome organizers such as CTCF (Nora et al., 2017) or  
381 cohesin (Rao et al., 2017; Schwarzer et al., 2017) resulted in vast deregulation of TADs, however it did  
382 not show dramatic changes in gene expression as one would expect. On the contrary, SATB1 depletion  
383 did not result in any changes of TADs or high order chromatin organization, yet the long-range promoter-  
384 enhancer interactions were highly deregulated as well as the underlying transcriptional programs.

385 It was not clear so far whether SATB1 should be primarily assigned a role as an activator or a  
386 repressor. This characteristic makes SATB1 markedly similar to the ubiquitously expressed factor YY1.  
387 YY1 was also found enriched at promoters and enhancers, mediating their spatial contacts (Weintraub et  
388 al., 2017); however, depending on the cellular context it has also been found in association with  
389 Polycomb repressive complexes (Bracken and Helin, 2009). It would be interesting to further investigate  
390 the determinants of such functional ambiguity for such factors. In our experimental setup, we have  
391 demonstrated the activatory function of SATB1, in specifically mediating promoter-enhancer long-range  
392 chromatin interactions. Although the repressed nuclear environment of *Satb1* cKO cells was in agreement

393 with those findings, we should note that in our study we were mostly focused on functions of the long  
394 SATB1 protein isoform. The presence of two SATB1 protein isoforms was recently described by our  
395 group (Zelenka et al., Submitted) and it could be another reason, aside from various post-translational  
396 SATB1 variants (Kumar et al., 2006; Zelenka and Spilianakis, 2020), supporting its functional ambiguity.  
397 We showed that the long SATB1 protein isoform had a higher propensity to undergo phase transitions  
398 compared to the short isoform (Zelenka et al., Submitted). Considering the proposed model of  
399 transcriptional regulation via liquid-liquid phase separated transcriptional condensates (Cho et al., 2018;  
400 Sabari et al., 2018), we reasoned that even the subtle differences in biophysical properties between the  
401 two SATB1 isoforms may play an important regulatory role. Following these observations, we  
402 hypothesize a model in which SATB1-mediated contacts between promoters and enhancers are attracted  
403 to the transcriptional condensates depending on the type and concentration of the SATB1 variants  
404 present. Post-translational modifications and/or different SATB1 isoforms would therefore regulate the  
405 whole process and under certain conditions, SATB1 could even function as a repressor. Thus, in  
406 comparison to other transcription factors capable of mediating long-range chromatin interactions, the  
407 SATB1's mode of action may include one or more mechanisms that were proposed (Giammartino et al.,  
408 2020; Kim and Shendure, 2019; Stadhouders et al., 2019); i.e. via direct (Wang et al., 2012, 2014) or  
409 indirect (Fujii et al., 2003; Jangid et al., 2014; Kumar et al., 2005; Purbey et al., 2009; Yasui et al., 2002)  
410 oligomerization or via phase separation (Zelenka et al., Submitted). Overall, the presence of proteins like  
411 SATB1 with tissue-restricted expression profile, may represent the missing link between chromatin  
412 organization and tissue-specific transcriptional regulation.

413         One of our goals was to provide molecular mechanisms such as the 3D chromatin organization  
414 of T cells in order to explain the phenotypical malformations observed in the *Satb1* cKO mice. *Satb1*-  
415 deficient mice suffer from multiple health problems, markedly resembling autoimmunity. Previous  
416 research suggested a cell-extrinsic mechanism of autoimmunity based on the deregulation of regulatory  
417 T cells (Kitagawa et al., 2017). Here we presented that SATB1 is a regulator of several genes involved

418 in T cell development, such as *Bcl6*, *Tcf7*, *Lef1*, *Cd6*, *Cd8*, *Lta*, *Ltb* and others. The individual  
419 deregulation of most of these genes would also result in deregulated immune responses. A great example  
420 for a cell-intrinsic mechanism of autoimmunity in the *Satb1* cKO is the SATB1-mediated spatial  
421 rearrangement of the TCR $\alpha$  enhancer and the TCR locus *per se*, controlling TCR recombination. A  
422 previous study linked the deregulation of the TCR $\alpha$  locus identified in the *Satb1* cKO to the  
423 downregulation of the *Rag1* and *Rag2* genes (Hao et al., 2015). In addition to this deregulation and the  
424 SATB1-mediated regulatory loops at the *Rag* locus, we also revealed the deregulation of chromatin  
425 accessibility and H3K27ac looping at the TCR locus. This was correlated with the SATB1-mediated  
426 chromatin loops and ultimately the defective usage of the different TCR segments. Since the recruitment  
427 of RAG proteins is based on the epigenetic status of a gene locus (Maman et al., 2016; Teng et al., 2015),  
428 we hypothesized that the altered TCR organization, due to missing SATB1-mediated loops, together with  
429 the disrupted recruitment of chromatin modifying complexes interacting with SATB1 (Fujii et al., 2003;  
430 Jangid et al., 2014; Kumar et al., 2005; Purbey et al., 2009; Yasui et al., 2002), would be critical  
431 contributors for the defective TCR arrangement in the *Satb1* cKO. Moreover, the impact of the 3D  
432 organization of TCR and BCR, necessary for proper VDJ recombination was recently highlighted (Peters,  
433 2021; Rogers et al., 2021).

434         Apart from the TCR $\alpha$  locus, the most affected gene regarding the differential interaction analysis  
435 of regulatory loops between WT and *Satb1* cKO thymocytes was *Bcl6*. BCL6 represents a master  
436 regulator of Tfh (Johnston et al., 2009; Nurieva et al., 2009; Yu et al., 2009) and innate-like T cells  
437 (Gioulbasani et al., 2020). We have demonstrated that the Tfh program is deregulated in the *Satb1* cKO  
438 utilizing several research approaches. Moreover, the blockade at stage 0 (ST0) of iNKT development in  
439 *Satb1*-deficient mice was previously reported (Kakugawa et al., 2017), collectively suggesting a potential  
440 link between SATB1-mediated regulation of *Bcl6* and these developmental programs. BCL6 is known  
441 to function as an antagonist of factors specifying other cell lineage fates (Vinuesa et al., 2016; Wu et al.,  
442 2018), especially of PRDM1 and underlying Th17 lineage specification (Johnston et al., 2009). Indeed,

443 the increased IL-17 response we observed in the cytokine milieu of *Satb1* cKO mouse sera (Figure 1D),  
444 suggests a favored Th17 specification due to downregulation of BCL6. However, since the depletion of  
445 SATB1 and its underlying regulome took place already during the intra-thymic development  
446 (*Satb1*<sup>fl/fl</sup>*Cd4-Cre*<sup>+</sup>), we hypothesize that the increased IL-17 cytokine levels were primarily due to  
447 potentially elevated  $\gamma\delta$ T17 cells. Based on the transcriptomic analysis depicted in Figure 5A (RNA-seq,  
448 WT/*Satb1* cKO) we have detected the overexpression of the TCR $\delta$  locus and correspondingly also of the  
449 V $\gamma$ 4<sup>+</sup> and V $\gamma$ 6<sup>+</sup> chains which are expressed in  $\gamma\delta$ T17 cells (Buus et al., 2016; Haas et al., 2012; Muñoz-  
450 Ruiz et al., 2017; Papotto et al., 2017). Moreover, the most overexpressed gene in *Satb1* cKO thymocytes,  
451 as indicated by our RNA-seq experiments, was *Maf* (encoding c-MAF; log2FC = 3.696 in female thymus  
452 and log2FC = 7.349 in male DP cells), which was shown to be essential for the commitment of  $\gamma\delta$ T17  
453 cells (Zuberbuehler et al., 2019).

454 Our findings point to the regulatory overlap between TCR recombination and transcriptional  
455 activity of master regulator genes in T cells, collectively orchestrated via spatial chromatin arrangements  
456 controlled by SATB1 and ultimately leading to the control of developmental decisions in the thymus.  
457 We provide a unique report on the functional intersection between CTCF and a tissue-specific genome  
458 organizer such as SATB1. Using the link between the altered 3D enhancer network and the physiological  
459 deregulation of *Satb1* cKO animals, we demonstrate the importance of the functional layer of chromatin  
460 organization provided by transcription factors such as SATB1. Our goal is to stir up a discussion about  
461 the existence of other tissue- or cell type-restricted factors, potentially contributing to the higher  
462 complexity and direct regulatory potential of the 3D chromatin architecture.

## 463 **Acknowledgements**

464 We would like to thank Elena Deligianni for the neonatal thymi image acquisition, Sevasti  
465 Papadogiorgaki and George Chalepakis for transmission electron microscopy and George Garinis and  
466 Manouela Kapsetaki for fruitful discussions. Molecular graphics and analyses were performed with  
467 UCSF Chimera, developed by the Resource for Biocomputing, Visualization, and Informatics at the  
468 University of California, San Francisco, with support from NIH P41-GM103311. This work was  
469 supported by the European Union (European Social Fund ESF) and Greek national funds through the  
470 Operational Program ‘Education and Lifelong Learning’ of the National Strategic Reference Framework  
471 (NSRF) Research Funding Program ARISTEIA [MIRACLE 42], by FONDATION SANTE (X-COAT)  
472 and by Chromatin3D-H2020-MSCA-ITN (GA642934). D.P. was supported by the Polish National  
473 Science Centre (2019/35/O/ST6/02484 and 2020/37/B/NZ2/03757), Foundation for Polish Science co-  
474 financed by the European Union under the European Regional Development Fund (TEAM to DP), and  
475 by Warsaw University of Technology within the Excellence Initiative: Research University (IDUB)  
476 programme. The funders had no role in study design, data collection and analysis, decision to publish, or  
477 preparation of the manuscript.

## 478 **Author contributions**

479 T.Z. and C.S. designed the study. T.Z. performed the genomics and immunofluorescence experiments.  
480 T.Z. and A.K. performed the computational analyses. S.F. consulted for library construction and  
481 performed sequencing experiments. P.T. and D.T. created the *Satb1* cKO mouse. T.Z. and D.T.  
482 performed animal, histology and flow cytometry experiments. D.A.P. performed the western blot  
483 experiments. I.R.T. performed computational 3D modeling experiments. D.P. and C.N. consulted the  
484 computational analyses. T.Z. wrote the original manuscript. C.S. supervised the work, obtained funding  
485 and corrected the manuscript. All authors read, discussed and approved the manuscript.

486 **Declaration of interests**

487 The authors declare no competing interests.

488 **Data availability**

489 All genomics experiments are deposited in Gene Expression Omnibus database under accession  
490 number GSE173476. Other datasets will be provided upon a reasonable request.

491

## 492 **Methods**

### 493 **Animals and isolation of thymocytes**

494 All experiments were conducted in accordance with the Laboratory Animal Care and Ethics Committee  
495 of IMBB-FORTH. Animal work was approved by the IMBB Institutional Animal Care and Ethics  
496 Committee. All the experiments were performed on mice with C57BL/6 background. The generation of  
497 *Satb1*<sup>fl/fl</sup> mice was previously described (Denaxa et al., 2012). The *Satb1* cKO (conditional knockout)  
498 mouse under study was created by crossing the *Satb1*<sup>fl/fl</sup> mouse with a *Cd4-Cre* transgenic animal. The  
499 animals used for the experiments were 4-8 weeks old, unless otherwise specified. Primary thymocytes  
500 were resuspended by rubbing and passing the thymus through a 40 µm cell strainer (Falcon, 352340) into  
501 1X PBS buffer. Cells were washed twice with 1X PBS: cells were centrifuged at 500 g, 4°C for 5 minutes,  
502 resuspended in 10 ml of 1X PBS and both steps were repeated. Prepared thymocytes were either used  
503 directly for experiments or fixed with 1% methanol-free formaldehyde (Pierce, 28908) at room  
504 temperature (RT) for 10 minutes while rocking. To quench the reaction, glycine was added to 0.125 M  
505 final concentration and incubated at RT for 5 minutes, while rocking. Cells were centrifuged at 1,000 g,  
506 4°C for 5 minutes and washed twice with ice cold 1X PBS.

### 507 **Flow cytometry**

#### 508 Characterization of T cell populations in the *Satb1* cKO

509 Depending on the experiment, we used either thymocytes or splenocytes. Splenocytes were isolated in  
510 the same way as thymocytes, but they were further resuspended in plain water for 3 seconds to lyse  
511 erythrocytes, with immediate dilution by HBSS (Gibco, 14180) to a final 1X concentration. One million  
512 cell aliquots were distributed into 5 ml polystyrene tubes (BD Falcon 352052). For the experiments  
513 probing the percentage of apoptotic cells in tissues, we followed the PI/Annexin protocol (Biolegend,  
514 640914). For staining with antibodies, we washed the cells once with Staining Buffer (1X PBS, 2% FBS,  
515 0.1% NaN<sub>3</sub>) and then stained in 100 µl of Staining Buffer with 1 µl of antibodies at 4°C for 30 minutes.  
516 The stained cells were washed with excess of Wash Buffer (1X PBS, 0.5% FBS) and then analyzed on  
517 FACSCalibur flow cytometer. The antibodies used in flow cytometry experiments were anti-DNA PI-

518 conjugated (Biolegend-79997), anti-Phosphatidylserine FITC conjugated (Biolegend-640906), anti-CD4  
519 PE conjugated (Pharmingen-553730), anti-CD8a APC conjugated (Biolegend-100712), anti-CD44 PE  
520 conjugated (Pharmingen-553134) and anti-CD62L FITC conjugated (Biolegend-104406).

#### 521 Infiltration of CD4<sup>+</sup> cells in pancreas

522 Pancreas was isolated from three WT and three *Satb1* cKO mice of 120-136 days of age. Pancreas was  
523 cut in pieces and digested in 5 ml of 1 mg/ml collagenase (SIGMA, C2674) in PBS solution at 37°C for  
524 30 minutes. Samples were washed twice with 5% FBS in PBS and filtered through a polypropylene mesh.  
525 After centrifugation, cell pellets were resuspended in 1 ml of 0.05% Trypsin solution and incubated for  
526 5 minutes at 37°C. Cells were washed twice with ice-cold PBS and eventually filtered through a 40 µm  
527 cell strainer and blocked in 5 ml of 5% FBS in PBS for 30 minutes at 4°C. Cells were stained with 1:200  
528 CD4-PE and CD8-APC for 30 minutes at 4°C and then washed twice with 0.5% FBS in 1X PBS. Lastly,  
529 cells were resuspended in 2% FBS in 1X PBS and analyzed by flow cytometry.

#### 530 **Characterization of the cytokine milieu**

531 Cytokines were characterized and quantified from serum of 16 female mice (5 WT, 11 *Satb1* cKO) of  
532 varying age 1-7 months by the LEGENDplex (13-plex) Mouse Th Cytokine Panel V02 (Biolegend,  
533 740741; Lot B289245) according to the manufacturer's instructions. Data were analyzed by the provided  
534 software LEGENDplex 8.0.

#### 535 **Intraperitoneal glucose tolerance test**

536 Groups of four WT and five *Satb1* cKO animals of 85 days (±8) of age were fasted for 6 hours. Weight  
537 and blood glucose levels were measured before and after the fasting period. 10% dextrose solution was  
538 injected intraperitoneally – the volumes were adjusted individually for each animal in order to inject 2 g  
539 of dextrose per kg of body mass. Blood (taken from tail) glucose levels were measured at given time  
540 points using Bayer Contour XT machine with Bayer Ascensia Contour Microfill Blood Glucose Test  
541 Strips. Animals were sacrificed and their pancreas was used for histology sections to demonstrate the  
542 disturbance of the islets of Langerhans.



543 **Histology and tissue sectioning**

544 Samples were fixed in 4% formaldehyde in 1X PBS (pH 7.4) for 12-15 hours at 4°C. Tissues were rinsed  
545 in PBS and stored in PBS at 4°C until embedding. For embedding, samples were dehydrated for 30  
546 minutes in 70% ethanol, 2x30 minutes in 90% ethanol and 3x30 minutes in 100% ethanol – all at RT  
547 while stirring. Specimens were cleared for 2x60 minutes in xylol and then impregnated for 1-2 hours at  
548 58°C with paraffin. Samples were positioned in embedding moulds and left overnight to harden. Samples  
549 were sectioned on a sliding microtome to achieve 5-10 µm thin sections. The prepared sections on glass  
550 slides were deparaffinized for 30 minutes at 65°C and then for 2x 30 minutes in Neo-Clear (Merck  
551 Millipore, 109843). Samples were rehydrated for 2x 10 minutes in 100% ethanol, 1x 5 minutes in 90%  
552 ethanol, 1x 5 minutes in 70% ethanol, 1x 5 minutes in 50% ethanol, 1x 5 minutes in 30% ethanol and 1x  
553 5 minutes in 1X PBS. Samples were immersed in Haematoxylin bath for 5 minutes in dark and then  
554 washed by running water for 5-10 minutes and in 1X PBS for 1 minute. Next, samples were immersed  
555 in Eosin bath for 30 seconds in dark and then washed by running water for 5-10 minutes and in 1X PBS  
556 for 1 minute. Samples were dehydrated again by dipping ten times in 30%, 50% and 70% ethanol and  
557 then incubated for 2x2 minutes in 100% ethanol. Eventually, samples were incubated for 2x10 minutes  
558 in xylene and then mounted using Entellan® new (Merck Millipore, 107961).

559 **Transmission electron microscopy**

560 For scanning electron microscopy (SEM), fresh thymi were cut into small blocks. Briefly, tissue was  
561 fixed for 2 hours with 2% paraformaldehyde – 2% glutaraldehyde in 0.1 M sodium cacodylate buffer.  
562 Samples were post-fixed overnight in 1% osmium tetroxide (OTO method) and dehydrated in a graded  
563 series of ethanol. Specimens were coated in gold, mounted on aluminum stubs and examined with a  
564 JEOL JSM6390 LV scanning electron microscope (Peabody, MA) using an accelerating voltage of  
565 15 kV.

566 **Detection of autoantibodies**

567 The WT pancreas sample was prepared as previously described. 5 µm thick sections were deparaffinized  
568 at 55°C for 8 min and then processed in the following solutions: 2x 3 minutes in Neo-Clear, 2x 3 minutes

569 in 100% ethanol, 1x 3 minutes in 95% ethanol, 1x 3 minutes in 70% ethanol, 1x 3 minutes in 50% ethanol.  
570 Samples were then rinsed with water and carefully dried with a paper towel. Tissue was circled with a  
571 PAP pen, let dry for 1 minute and then dipped in PBS for 2 minutes. Antigens were retrieved by  
572 incubation with 130  $\mu$ l of TE-Triton-PK solution (2 ml TE buffer, 10  $\mu$ l 0.5% Triton X-100, 40  $\mu$ g  
573 Proteinase K) in a humidified chamber at 37°C, for 12 minutes. Samples were then washed twice with  
574 TBST buffer (10 mM Tris-HCl – pH 8.0, 150 mM NaCl, 0.05% Tween-20) for 3 minutes each. Samples  
575 were blocked by incubation with 5% normal goat serum (NGS) in TBST buffer at RT for 30 minutes in  
576 a humidified chamber. Samples were incubated at 4°C overnight with blood serum collected from two  
577 WT and four *Satb1* cKO animals of 4-7 months of age. Serum was diluted 1:10 in 5% NGS-TBST and  
578 5% NGS-TBST was used as a negative control. Samples were washed twice with TBST, 5 minutes each.  
579 Samples were incubated with a goat anti-mouse IgG antibody (H+L; Invitrogen, A-11032) conjugated  
580 with Alexa Fluor 594, diluted 1:500 in TBST at RT for 1 hour. Samples were washed three times, 5  
581 minutes each, with TBST and incubated with 1  $\mu$ M DAPI solution in 5% NGS-TBST at RT for 10  
582 minutes. Samples were washed three times, 5 minutes each, with TBST and mounted with Mowiol on  
583 glass slides.

## 584 **Hi-C and HiChIP experiments**

### 585 Generation of proximity-ligated contacts

586 A biological duplicate was used for each sample. Both Hi-C and HiChIP experiments were performed  
587 identically until the chromatin immunoprecipitation step. Aliquots of 10 million isolated thymocytes  
588 resuspended in 1X PBS were fixed by adding 1/10<sup>th</sup> volume of fixation buffer [11% methanol-free  
589 formaldehyde (Pierce, 28908), 100 mM NaCl, 1 mM EDTA, 0.5 mM EGTA, 50 mM HEPES pH 8.0] with  
590 rocking at RT for 10 minutes. To quench the reaction, glycine was added to 0.125 M final concentration  
591 and incubated at RT for 5 minutes, while rocking. After two washes with 1X PBS, cell pellet was  
592 resuspended in 500  $\mu$ l of ice-cold Hi-C Lysis Buffer (10 mM Tris-HCl – pH 8, 10 mM NaCl, 0.2% NP40,  
593 0.5 mM PMSF) and rotated at 4°C for 1.5 hours. Cells were centrifuged at 2,500 g, at 4°C for 5 minutes  
594 and the supernatant was discarded. The cell pellet was washed once with 500  $\mu$ l of ice-cold Hi-C Lysis

595 Buffer and then resuspended in 100  $\mu$ l of 0.5% SDS. Cells were incubated at 62 °C for 10 minutes and  
596 then combined with 296  $\mu$ l of H<sub>2</sub>O and 50  $\mu$ l of 20% Triton X-100. Samples were incubated at 37°C for  
597 15 minutes and then combined with 50  $\mu$ l of 10X DpnII Buffer and 200 U of DpnII restriction enzyme  
598 (NEB, R0543M) and digested for additional 16 hours at 37 °C while shaking (160 rpm). The restriction  
599 enzyme was inactivated at 62°C for 20 minutes and the nuclei were centrifuged at 2,500 g, at 4 °C for 6  
600 minutes. The supernatant was discarded and the nuclei were resuspended in 300  $\mu$ l Fill-in Buffer  
601 containing 30  $\mu$ l Klenow Buffer 10X (NEB, M0210L), 15  $\mu$ l 1 mM Biotin-16-dCTP (Jena Bioscience,  
602 NU-809-BIO16-L), 1.5  $\mu$ l 10 mM dATP (Promega, U1240), 1.5  $\mu$ l 10 mM dGTP (Promega, U1240), 1.5  
603  $\mu$ l 10 mM dTTP (Promega, U1240), 12  $\mu$ l 5 U/ $\mu$ l DNA Polymerase I, Klenow Fragment (NEB, M0210L)  
604 and 238.5  $\mu$ l water. The biotinylation mixture was incubated at 37°C for 30 minutes with rotation. SDS  
605 was added to a final concentration of 0.5% to inactivate the Klenow enzyme. Triton X-100 was added to  
606 1% final concentration and samples were incubated at 37°C for 5 minutes. Samples were centrifuged at  
607 2,500 g, at 4 °C for 10 minutes and the supernatant was discarded. The nuclei pellet was resuspended in  
608 the Ligation Buffer containing 120  $\mu$ l 10X NEB T4 DNA Ligase Buffer supplemented with 10 mM ATP  
609 (NEB, B0202), 60  $\mu$ l 20% Triton X-100 (1% final), 6  $\mu$ l 2% (20 mg/ml) BSA, 40  $\mu$ l 30% PEG 6,000  
610 (1% final), 5  $\mu$ l 400 U/ $\mu$ l T4 DNA Ligase (NEB, M0202L) and 969  $\mu$ l water. The samples were incubated  
611 for 6 hours at RT with mild rotation. Nuclei were centrifuged at 2,400 g, at RT for 15 minutes and the  
612 supernatant was discarded. The pellet was resuspended in 60  $\mu$ l Lysis Buffer (1% SDS, 50 mM Tris-HCl  
613 – pH 8, 20 mM EDTA, 1X protease inhibitors) and incubated at RT for 15 minutes. The lysate was  
614 diluted to 600  $\mu$ l using ice cold TE Buffer supplemented with protease inhibitors and then sonicated with  
615 a Labsonic M – Tip sonicator for 3 cycles (30 seconds ON/OFF, 40% power). The sonicated material  
616 was centrifuged at 16,000 g, at RT for 15 minutes and the supernatant was collected into a new tube.  
617 Samples from the same genotype were merged and then split again: separately 100  $\mu$ l for Hi-C and 450  
618  $\mu$ l for HiChIP.

619 **Hi-C** samples were combined with two volumes of Hi-C Elution Buffer (10 mM Tris-HCl – pH 8, 5 mM  
620 EDTA, 300 mM NaCl, 1% SDS) and incubated at 65°C overnight. Decrosslinked material was diluted  
621 to 500 µl with TE Buffer and treated with RNase A and Proteinase K as previously described. DNA was  
622 purified using a ChIP DNA Clean & Concentrator kit following the manufacturer’s instructions (Zymo  
623 Research, D5205). Purified DNA was quantified using Qubit dsDNA BS Assay Kit (Invitrogen, Q32853)  
624 checked on an agarose gel for shearing efficiency and 100 µg were used for library construction.

625 **HiChIP** samples were combined with Triton X-100 to 1% final concentration and samples were  
626 incubated at 37°C for 15 minutes. Samples were combined with an equal volume of 2X ChIP Binding  
627 Buffer (20 mM Tris-HCl – pH 8, 2 mM EDTA, 0.2 % sodium deoxycholate, 2X protease inhibitors).  
628 Chromatin preclearing and antibody binding to magnetic beads were performed as described in the ChIP  
629 protocol. The following antibodies were used for the immunoprecipitation step: 8 µg of custom-made  
630 David’s Biotechnologies SATB1 long isoform, 7 µg Abcam (ab70303) anti-CTCF and 2 µg Abcam  
631 (ab4729) anti-H3K27ac.

632 Antibody-coupled beads were incubated with chromatin at 4°C with rotation for 16 hours. Beads  
633 were washed five times with ice cold RIPA Buffer (50 mM Hepes pH 8, 1% NP-40, 0.70% Na-  
634 Deoxycholate, 0.5 M LiCl, 1 mM EDTA, protease inhibitors) and then twice with TE Buffer. After the  
635 first wash with TE Buffer, resuspended beads were transferred into a new tube. Immune complexes  
636 bound to beads were eluted in 125 µl Hi-C Elution Buffer (10 mM Tris-HCl – pH 8, 5 mM EDTA, 300  
637 mM NaCl, 1% SDS) at 65°C for 16 hours. Decrosslinked material was diluted to 250 µl with TE Buffer  
638 and treated with RNase A and Proteinase K as previously described. DNA was purified using a ChIP  
639 DNA Clean & Concentrator kit following the manufacturer’s instructions (Zymo Research, D5205).  
640 Purified DNA was quantified using Qubit dsDNA HS Assay Kit (Invitrogen, Q32854) and used for  
641 library construction.

642 Biotin pull-down and library construction

643 Samples were brought to 25  $\mu$ l with water. 5  $\mu$ l and 20  $\mu$ l for HiChIP / Hi-C samples, respectively, of  
644 Dynabeads MyOne Streptavidin C1 beads (Invitrogen, 65001) were washed with 500  $\mu$ l Tween Wash  
645 Buffer (5 mM Tris-HCl – pH 7.5, 0.5 mM EDTA, 1 M NaCl, 0.05% Tween-20). Beads were resuspended  
646 in 25  $\mu$ l of 2X Biotin Binding Buffer (10 mM Tris-HCl – pH 7.5, 1 mM EDTA, 2M NaCl) and combined  
647 with samples. Samples were incubated at RT for 20 minutes. Beads were separated on a magnet and  
648 washed twice with 400  $\mu$ l of Tween Wash Buffer. Beads were washed by 100  $\mu$ l of 1X TD Buffer (10  
649 mM Tris-HCl – pH 7.5, 5 mM MgCl<sub>2</sub>, 10% Dimethylformamide). Beads were resuspended in 25  $\mu$ l of  
650 2X TD Buffer and combined with Tn5 enzyme from the Nextera DNA Sample Preparation Kit (Illumina,  
651 FC-121-1030) and water to final volume 50  $\mu$ l. The amount of Tn5 enzyme was adjusted according to  
652 the input DNA amount: 4.5  $\mu$ l for Hi-C libraries, 1.5  $\mu$ l for SATB1 HiChIP and 1  $\mu$ l for other HiChIP  
653 libraries. The reaction was incubated at 55°C for 10 minutes. The beads were collected with a magnet  
654 and the supernatant was discarded. Beads were resuspended in 300  $\mu$ l of Strip Buffer (0.15% SDS, 10  
655 mM Tris-HCl – pH 8, 50 mM EDTA) and incubated for 5 minutes at RT to strip off and deactivate Tn5.  
656 Beads were washed once with 400  $\mu$ l of Tween Wash Buffer and once with 500  $\mu$ l of 10 mM Tris-HCl  
657 (pH 8.0). The beads were resuspended in 50  $\mu$ l of the following PCR master mix with indexed primers  
658 from the Nextera DNA Sample Preparation Index Kit (Illumina, FC-121-1011): Phusion HF 2X (NEB,  
659 M0531L) 25  $\mu$ l, Nextera Index 1 (N7XX 5.5  $\mu$ M) 1  $\mu$ l (1.5 for Hi-C), Nextera Index 2 (N5XX 5.5  $\mu$ M)  
660 1  $\mu$ l (1.5 for Hi-C) and water 23  $\mu$ l (22 for Hi-C). The PCR reaction was performed following the program  
661 72°C for 5 minutes and repeated cycles of 98°C for 15 seconds, 63 °C for 35 seconds, 72 °C for 1 minute.  
662 The number of PCR cycles was estimated based on post-ChIP quantification and amplification was 6  
663 cycles for Hi-C libraries, 11 cycles for SATB1 HiChIP and 13 cycles for the other HiChIP libraries. DNA  
664 libraries were purified and size-selected using AMPure XP beads, quantified by Qubit and analyzed on  
665 a Bioanalyzer, as previously described. The DNA Libraries were sequenced on an Illumina® HiSeq 4000  
666 2x 75 bp platform by the sequencing facility at IKMB, Kiel University, Germany.

667 Data processing

668 Raw reads were mapped with bowtie2 (Langmead and Salzberg, 2012) to the mm10 genome and fully  
669 processed using the HiC-Pro pipeline (version 2.11.1; Servant et al., 2015) with default parameters. All  
670 biological replicates were processed individually to assess their quality and then combined for  
671 downstream analyses and visualization. The HiChIP datasets were additionally processed by FitHiChIP  
672 (Bhattacharyya et al., 2019). Unless stated otherwise, the following parameters were used to call HiChIP  
673 loops: 5,000 kbp resolution, 20000-2000000 distance threshold, FDR 0.01, coverage specific bias  
674 correction, merged nearby peak to all interactions. Differential interacting areas between SATB1 and  
675 CTCF HiChIP matrices at 100 kbp and 500 kbp resolution were analyzed using diffHic (Lun and Smyth,  
676 2015).

677 For the differential analysis of H3K27ac WT and *Satb1* cKO HiChIP datasets, we utilized the  
678 differential analysis pipeline from FitHiChIP (Bhattacharyya et al., 2019) and only utilized loops that  
679 were classified as differential in 3D but not in 1D. These were loops that showed differences in interaction  
680 counts but no significant differences in H3K27ac occupancy at loop anchors. Since some regions  
681 contained H3K27ac loops from both under- and over-interacting categories, we furthermore calculated a  
682 difference between the number of under- and overinteracting loops.

683 Binding site datasets, needed to call HiChIP loops, were either derived from HiChIP data or an  
684 external ChIP-seq dataset. The SATB1 binding sites were extracted from another HiChIP experiment  
685 with >60% Dangling End Pairs (~280 million reads), using the PeakInferHiChIP.sh script from  
686 FitHiChIP (--nomodel --extsize 147; filter peaks with >2.5 enrichment). SATB1 binding sites were  
687 compared to a published SATB1 ChIP-seq dataset (GSM1617950; Hao et al., 2015). Both our biological  
688 replicates and the published dataset revealed similar overrepresented categories in genome and gene  
689 ontology functional analyses as well as a high overlap of peaks and differentially expressed genes. The  
690 H3K27ac peaks were derived similarly from the HiChIP datasets (separately for two biological replicates  
691 and then merged). The CTCF peaks were also derived the same way and motif analysis with MEME  
692 (Bailey and Elkan, 1994) validated the high enrichment of the CTCF binding motif in the HiChIP derived

693 peaks, confirming its specificity. However, due to a relatively low number of HiChIP-derived CTCF  
694 binding sites, for FitHiChIP loop calling and other computational analyses, we employed a CTCF ChIP-  
695 seq dataset from the ENCODE project (ENCFF714WDP; Dunham et al., 2012). Only for the  
696 visualization purposes, we used combined datasets (mergeBed command of bedtools; Quinlan and Hall,  
697 2010) of our HiChIP-derived binding sites and publicly available ChIP-seq datasets for both SATB1  
698 (GSM1617950; Hao et al., 2015) and CTCF (ENCFF714WDP; Dunham et al., 2012). Since our  
699 antibodies were specific for the long SATB1 isoform, we used the dataset combined with the public  
700 ChIP-seq to ensure that all types of SATB1 peaks were shown.

701         At the TCR locus, whole DNA segments are missing in some cells due to V(D)J recombination.  
702 Thus, in the cell population some regions of TCR are underrepresented compared to other genomic loci  
703 and this fact penalizes loop or binding site calling at the TCR locus. For this reason, for the TCR analysis  
704 we used different datasets with adjusted and more relaxed parameters to compensate for this. For the  
705 purpose of loop calling in HiChIP experiments, we utilized the combined binding site datasets of our  
706 HiChIP-derived binding sites and publicly available ChIP-seq datasets for both SATB1 (GSM1617950;  
707 Hao et al., 2015) and CTCF (ENCFF714WDP; Dunham et al., 2012). Furthermore, the following  
708 parameters were used: 10,000 kbp resolution, 20000-2000000 distance threshold, FDR 0.05, coverage  
709 specific bias correction, merged nearby peak to all interactions.

710         For operations with matrices, the datasets were processed using hicexplorer (Ramírez et al.,  
711 2018). Hi-C and HiChIP matrices were normalized to the smallest dataset from each compared pair, i.e.  
712 WT vs SKO Hi-C, SATB1 vs CTCF HiChIP and WT vs SKO H3K27ac HiChIP. Normalized matrices  
713 were corrected using *hicCorrectMatrix* based on the diagnostic plots applying a KR balancing method  
714 (Knight and Ruiz, 2013). The analysis of A/B compartments was done according to the original protocol  
715 (Lieberman-Aiden et al., 2009) using hicexplorer (Ramírez et al., 2018) and/or by HOMER (Heinz et al.,  
716 2010). Differential analysis of TADs was performed using TADCompare (Cresswell and Dozmorov,  
717 2020) at 100 kbp resolution on matrices combined for both biological replicates to compare WT and

718 *Satb1* cKO. As a control we also compared TADs called from individual replicates of each genotype.  
719 Visualization of matrices was done by hicexplorer (Ramírez et al., 2018), pyGenomeTracks and/or by  
720 Juicebox (Durand et al., 2016). APA scores (Rao et al., 2014) were calculated and visualized by SIPMeta  
721 (Rowley et al., 2020) and/or by Juicer Tools (Durand et al., 2016).

## 722 **Stranded-total-RNA sequencing**

### 723 Experimental protocol

724 Freshly isolated thymocytes from female animals were resuspended in 1 ml of TRIzol Reagent  
725 (Invitrogen, 15596026) and RNA was isolated according to manufacturer's protocol. The aqueous phase  
726 with RNA was transferred into a tube and combined with 10 µg of Linear Acrylamide (Ambion,  
727 AM9520), 1/10 of sample volume of 3M CH<sub>3</sub>COONa (pH 5.2), 2.5 volumes of 100% Ethanol and tubes  
728 were mixed by flipping. Samples were incubated at -80°C for 40 minutes. Samples were centrifuged at  
729 16,000 g, at 4°C for 30 minutes. The supernatant was removed and the pellet was washed twice with  
730 75% Ethanol. The air-dried pellets were resuspended in 40 µl RNase-free water and incubated at 55°C  
731 for 15 minutes to dissolve RNA. To remove any residual DNA contamination, RNase-free DNase Buffer  
732 was added to the samples until 1X final concentration together with 20 units of DNase I (NEB, M0303L)  
733 and incubated at 37°C for 20 minutes. Samples were then purified using RNeasy Mini Kit (Qiagen,  
734 74104) according to the manufacture's protocol. RNA quality was evaluated using Agilent 2100  
735 Bioanalyzer with Agilent RNA 6000 Nano Kit (Agilent Technologies, 5067-1511). Libraries were  
736 prepared using an Illumina® TruSeq® Stranded Total RNA kit with ribosomal depletion by Ribo-Zero  
737 Gold solution from Illumina® according to the manufacturer's protocol and sequenced on an Illumina®  
738 HiSeq 4000 (2x 75 bp).

### 739 Data processing

740 Raw reads were mapped to the mm10 mouse genome using HISAT2 (Kim et al., 2019). Only mapped,  
741 paired reads with a map quality >20 were retained. Transcripts were assembled with StringTie (Pertea et  
742 al., 2015) using an evidence-based Ensembl-Havana annotation file. Transcripts and genes were  
743 summarized using featureCounts (Liao et al., 2014) and statistically evaluated for differential expression



744 using DESeq2 (Love et al., 2014). When application required an intra-sample transcript comparison,  
745 DESeq2 values were further normalized to the gene length. The functional analyses were performed by  
746 g:Profiler (Reimand et al., 2007). The plots depicting enriched BP terms and KEGG pathways were  
747 generated by presenting the top 20 pathways/terms with the lowest p-values.

## 748 **ATAC-seq**

### 749 Experimental protocol

750 A biological triplicate was used for each genotype. The ATAC-seq experiment was performed according  
751 to the Omni-ATAC protocol previously published (Corces et al., 2017), with modifications. Murine  
752 thymocytes were isolated as previously described, without fixation. To ensure the presence of only viable  
753 cells, cells were separated using Lympholyte®-M (Cedarlane, CL5030) according to the manufacturer's  
754 protocol. Isolated cells were washed twice with 1X PBS and aliquots of 10,000 cells were used for  
755 analysis. The cell pellet was gently resuspended by pipetting up and down three times in 50 µl of ice cold  
756 ATAC-RSB-NTD Buffer (10 mM Tris-HCl – pH 7.5, 10 mM NaCl, 3 mM MgCl<sub>2</sub>, 0.1% NP40, 0.1%  
757 Tween-20, 0.01% Digitonin) and incubated on ice for 3 minutes. Cell lysis was stopped by adding 1 ml  
758 of cold ATAC-RSB-T Buffer (10 mM Tris-HCl – pH 7.5, 10 mM NaCl, 3 mM MgCl<sub>2</sub>, 0.1% Tween-20)  
759 and inverting the tube three times to mix. Nuclei were centrifuged at 1,000 g, at 4°C for 10 minutes. The  
760 pellet was resuspended in 50 µl of Transposition Mix [25 µl 2X TD buffer (20 mM Tris-HCl – pH 7.6,  
761 10 mM MgCl<sub>2</sub>, 20% Dimethyl Formamide – before adding DMF, the pH was adjusted to 7.6 with 100%  
762 acetic acid), 2.5 µl transposase (100 nM final), 16.5 µl PBS, 0.5 µl 1% digitonin, 1 µl 5% Tween-20, 4.5  
763 µl H<sub>2</sub>O] by pipetting up and down six times. The reaction was incubated at 37°C for 30 minutes with  
764 occasional pipetting. DNA was purified with a DNA Clean & Concentrator-5 Kit (Zymo Research,  
765 D4013) according to the manufacturer's protocol. DNA was eluted in 20 µl of Elution Buffer and all the  
766 material was used in a PCR reaction, together with 25 µl Phusion HF 2X Master Mix (NEB, M0531L)  
767 and 2.5 µl of each Nextera Index 1 (N7XX) and Nextera Index 2 (N5XX) primers from a Nextera DNA  
768 Sample Preparation Index Kit (Illumina, FC-121-1011). PCR was performed according to the following  
769 protocol: 72°C for 5 minutes, 98°C for 1 minute and 5 cycles of 98 °C for 15 seconds, 63 °C for 35

770 seconds, 72 °C for 1 minute. The samples were put on ice and 5 µl of the pre-amplified mixture was  
771 combined with 15 µl of qPCR Master Mix using the following set-up: water 3.25 µl, primer ad1 0.5 µl,  
772 primer ad2 0.5 µl, 20x SYBR Green 0.75 µl, Phusion HF 2x Master mix 5 µl and pre-amplified sample  
773 5 µl. The qPCR reaction was run for 20 additional cycles following the program 98°C for 1 minute and  
774 5 cycles of 98°C for 15 seconds, 63 °C for 35 seconds, 72 °C for 1 minute.

775 Based on the Rn (Fluorescence) vs Cycle linear plot, a cycle with 1/4 up to 1/3 of the maximum  
776 fluorescence level was determined. This was the number of additional PCR cycles to run on the pre-  
777 amplified libraries which were stored on ice until this point. The final amplified libraries were purified  
778 using a DNA Clean & Concentrator-5 Kit (Zymo Research, D4013) according to the manufacturer's  
779 protocol and eluted in 20 µl of Elution Buffer. Libraries were quantified by Qubit and analyzed on a  
780 Bioanalyzer as previously described, followed by two-sided size selection using AMPure Beads.  
781 Libraries were sequenced on an Illumina® HiSeq 4000 2x 75 bp platform by the sequencing facility at  
782 IKMB, Kiel University, Germany.

### 783 Data processing

784 To acquire BAM files and ATAC-seq peaks, raw data were fully processed by the esATAC pipeline  
785 (Wei et al., 2018). To identify the regions with differential accessibility between genotypes, all esATAC  
786 called peaks across samples and replicates were pooled and tested for differences in accessibility levels.  
787 ATAC-seq counts were calculated for each peak, each replicate and each condition using FeatureCounts  
788 (Liao et al., 2014) and used as an input for edgeR (Robinson et al., 2010) with the standard parameters.  
789 A cutoff of  $|\log_{2}FC| \geq 1$  and p-value  $\leq 0.01$  was used to determine the differentially accessible regions.

790 To assess the accessibility around SATB1 binding sites BigWig files were generated.  
791 Mitochondrial reads and PCR duplicates were removed from all bam files using samtools (Li et al., 2009)  
792 and Picard MarkDuplicates (<http://broadinstitute.github.io/picard/>), respectively. Low quality and  
793 unmapped reads were removed using the following samtools command: `samtools view -h -b -F 1804 -f 2`  
794 `-q 30`. The final bam files were merged for the two conditions using samtools and RPKM normalized

795 BigWig files were generated using deeptools (Ramírez et al., 2016) with the following parameters: -of  
796 bigwig --effectiveGenomeSize 2652783500 --normalizeUsing RPKM -bl  
797 New\_merged\_mm10.blacklist.bed -bs 1. mm10 blacklisted regions were downloaded from ENCODE.  
798 Moreover, using the merged bam files, BigWig files with the log<sub>2</sub> ratio between the normalized reads of  
799 *Satb1* cKO and WT thymocytes were generated using deeptools bamCompare. The parameters were the  
800 same as above. SATB1 binding sites were first centered and then extended by 250 bp upstream and  
801 downstream. For each bp position, ATAC-seq signal was calculated using the generated BigWig files.  
802 Similarly, each TSS of each gene was centered and extended by 1 kbp upstream and downstream. For  
803 each base of each gene, an average log<sub>2</sub> fold change of normalized accessibility score (*Satb1* cKO vs  
804 WT) was plotted. To calculate the accessibility changes along the entire genes, genes and upstream and  
805 downstream regions were divided into bins and average log<sub>2</sub> fold change of normalized accessibility  
806 score for each bin was plotted.

### 807 **Immunofluorescence experiments**

808 Glass coverslips were coated by dipping in 0.1 mg/ml poly-D-lysine solution (Sigma Aldrich, P6407).  
809 Freshly isolated thymocytes were attached to the coated coverslips. Attached cells were washed once  
810 with 1X PBS and then fixed for 10 minutes on ice with 4% formaldehyde (Pierce, 28908) in 1X PBS.  
811 Fixed cells were permeabilized with 0.5% Triton-X in 1X PBS for 5 minutes on ice. Cells were washed  
812 three times with 1X PBS for 5 minutes each and blocked for 30 minutes at RT with Blocking Buffer  
813 [0.4% acetylated BSA (Ambion, AM2614) in 4X SSC] in a humidified chamber. Cells were incubated  
814 for 1.5 hours at RT with an antibody against Hp1 $\alpha$  (Merck Millipore, MAB3584, 1:500 dilution) and  
815 RNA Polymerase II (Santa Cruz, sc-900, 1:50) in Detection Buffer (0.1% acetylated BSA, 4X SSC, 0.1%  
816 Tween 20) in a humidified chamber. The excess of antibodies was washed away by three washes for 5  
817 minutes each with Washing Buffer (4X SSC, 0.1% Tween 20). Cells were incubated for 60 minutes at  
818 RT with a goat anti-rabbit antibody conjugated with Alexa Fluor 488 (1:250) and a goat anti-mouse  
819 antibody conjugated with Alexa Fluor 647 (1:250) in Detection Buffer (0.1% acetylated BSA, 4X SSC,

820 0.1% Tween 20) in a humidified chamber. The excess was washed away by three washes for 5 minutes  
821 each with Washing Buffer (4X SSC, 0.1% Tween 20). The cells were mounted in a hardening ProLong  
822 Gold medium with DAPI (Invitrogen, P36935). Images were taken using an inverted microscope  
823 DMI6000 CS with laser scanning confocal head Leica TCS SP8, equipped with a 63x/1.40 oil immersion  
824 objective. Images were analyzed using the Fiji software (Schindelin et al., 2012). Cells were manually  
825 selected and signal was measured as an integrated signal density from summed z-stacks.

### 826 **Cultivation of neonatal thymi**

827 Thymi of neonatal WT and *Satb1* cKO mice were collected and embedded in collagen. Thymi were  
828 cultivated in a medium (10% FBS, RPMI, HEPES, Pen-Strep, Glutamine,  $\beta$ -mercaptoethanol) for 30 hours  
829 and monitored with the Operetta high content screening microscope (PerkinElmer) to detect cells exiting  
830 the thymus. Images were pre-processed with the in-built analysis software Harmony 4.1 and then  
831 analyzed with custom-made macros in Fiji software (Schindelin et al., 2012). Random shifts were  
832 corrected by a StackReg plugin (Rigid Body transformation). Areas without any distortion were selected  
833 and cells outside the thymus were counted using Find Maxima function of Fiji. Each selection was  
834 normalized to the area size and for each animal the selections were averaged. The final result represents  
835 an average from different animals for each genotype.

### 836 **Linear regression model**

837 A linear regression model was built in R and used to identify the impact of individual variables from our  
838 datasets on log<sub>2</sub>FC RNA-seq values. The predictors used are described below: Each gene was binned  
839 into 3 bins. Moreover, two extra bins upstream of the TSS of each gene (upstream region: -4 kbp to -2  
840 kbp and promoter region: -2kb to TSS) and two extra bins downstream of the transcription termination  
841 site (TTS to +2 kbp and +2 kbp to +4 kbp) were used. SATB1 binding occupancy in WT cells was  
842 determined via a binary score for each bin of each gene. “1” indicated the presence of a SATB1 peak and  
843 “0” the absence of a SATB1 peak overlapping with the corresponding bin.

844 To quantify ATAC-seq signal differences between the *Satb1* cKO and WT thymocyte samples,  
845 the following calculation for each bin of each gene was used:  $\log_{10}[(\text{Satb1 cKO Normalized Reads} +$   
846  $0.01) / (\text{WT Normalized Reads} + 0.01)] * \log_2(\text{Total Normalized Reads} + 1)$

847 To utilize SATB1 and CTCF loops as predictors, we assigned to each gene the number of times  
848 it overlapped with the anchors of a SATB1 or CTCF loop. In case that both anchors of the same  
849 SATB1/CTCF loop overlapped a gene, only one was counted. The number of times, the anchors of a  
850 SATB1 loop were found to connect an enhancer with a gene, was also used as a predictor. The same  
851 metrics were calculated for overinteracting and underinteracting H3K27ac loops.

852 The quality plots of the model are depicted in Figure S2A-D and the adjusted R-square of the  
853 model was 0.1128. The change of the Akaike Information Criterion (AIC, Figure S2E) estimated how  
854 the quality of the model was affected when all the predictors were kept intact except one. The y-axis  
855 corresponds to the removed predictor, while the x-axis indicates how the AIC for the new model was  
856 altered. An increase indicated that the predictor was “useful” for the model. Based on the AIC plot,  
857 neither SATB1 binding upstream and downstream of genes nor CTCF-mediated loops contributed to the  
858 accuracy of the model. On the other hand, differences in chromatin accessibility and connectivity via  
859 H3K27ac loops along with SATB1-mediated loops performed very well as predictors. Non-useful  
860 predictors were not used in the final model. The final model coefficients for the important predictors are  
861 displayed in Figure S2F. The sign of each coefficient indicates whether a predictor is associated with  
862 decreased (negative) or increased (positive) RNA levels in *Satb1* cKO. Genes present at anchors of  
863 overinteracting H3K27ac chromatin loops and/or with increased chromatin accessibility were associated  
864 with increased RNA levels in *Satb1* cKO. In contrast, the genes present at anchors of underinteracting  
865 H3K27ac chromatin loops or SATB1-mediated loops and/or genes bound by SATB1 were associated  
866 with reduced RNA levels.

## 867 **Additional bioinformatics analyses**

### 868 Identification of SATB1 binding in H3K27ac HiChIP anchors

869 Loop anchors from WT H3K27ac HiChIP loops were pre-processed by extracting the anchors from both  
870 sides of loops and then they were merged into non-overlapping unique regions (mergeBed command of  
871 bedtools; Quinlan and Hall, 2010). The resulting regions were converted from mm10 to mm9 using  
872 CrossMap (Zhao et al., 2014) and were analyzed using the enrichment analysis ChIP-Atlas (Oki et al.,  
873 2018) against all the available murine ChIP-seq datasets from the blood cell type class and compared to  
874 100X random permutations.

#### 875 Publicly available ChIP-seq datasets

876 We utilized the CTCF ChIP-seq dataset from the ENCODE project (ENCFF714WDP; Dunham et al.,  
877 2012) and the SATB1 ChIP-seq (GSM1617950; Hao et al., 2015). For the analysis of enhancers, in  
878 relation to SATB1 and CTCF loops, we utilized the thymus-specific list of enhancers previously  
879 generated within the ENCODE project (GSE29184; Shen et al., 2012) – after extending the center of  
880 each enhancer by 50 bp upstream and downstream. Moreover, for visualization purposes we also utilized  
881 the H3K4me3 (ENCFF200ISF) and H3K4me1 (ENCFF085AXD) ChIP-seq datasets for thymus, from  
882 the ENCODE project (Davis et al., 2018). The H3K27ac ChIP-seq datasets were from WT and  
883 *Rad21<sup>fl/fl</sup>Cd4-Cre<sup>+</sup>* DP cells (Ing-Simmons et al., 2015) and they were first converted from mm9 to mm10  
884 using CrossMap (Zhao et al., 2014). An average file based on two biological replicates (GSM1504384+5  
885 for WT and GSM1504386+7 for *Rad21* cKO) was created and used for visualization.

#### 886 Overlap score calculation for HiChIP loops

887 The overlap score between SATB1 and CTCF loops was calculated as (number of overlapping bp) / (bp  
888 size of a loop). Overlaps between the two types of loops were found using bedtools (Quinlan and Hall,  
889 2010) and the above score was calculated using R. A score of one indicates either 100% overlap or  
890 engulfment of a loop mediated by one factor in a loop mediated by another factor. A score of zero  
891 indicates no overlap. In cases where a loop mediated by one factor intersected with multiple loops  
892 mediated by the other factor, the maximum score was used.

#### 893 Functional analyses of gene lists

894 All gene ontology pathway analyses were performed with the R package gProfileR (Reimand et al.,  
895 2007). Twenty biological processes pathways with the lowest p-values were plotted.

#### 896 Nucleosome binding

897 Nucleosome positions and factor occupancy was analyzed with NucleoATAC (Schep et al., 2015).  
898 NucleoATAC was run with standard parameters on merged ATAC-seq bam files, separately for each  
899 genotype. SATB1 and CTCF binding sites were used as the input for the occupancy analysis. Peaks were  
900 centered and extended 250 bp upstream and downstream prior to the analysis.

#### 901 Transcriptional insulation scores

902 We investigated whether the expression of genes inside SATB1 and CTCF loops was different from the  
903 neighboring genes outside the loops. To test this, we established an insulation score by calculating the  
904 difference between the mean expression of genes inside loops [ $\log_{10}(\text{counts} / \text{gene length} + 0.01)$ ] and  
905 the mean expression of genes found in the same size regions upstream and downstream from each loop.  
906 To compare the isolated values against a null distribution, loop coordinates were randomly shuffled  
907 across the genome and differences between the expression of genes residing inside the randomized loops  
908 with their neighbors were calculated as described above. If a shuffled loop was not containing any genes  
909 it was re-shuffled.

#### 910 Permutation analyses

911 In order to construct a null statistical model (e.g. determination of common genes between two gene  
912 subsets, estimation of expected peak overlaps), permutation analyses were performed. In cases of  
913 overlaps between two files with genomic coordinates, the coordinates of one file were shuffled 1,000  
914 times with the bedtools shuffle command (Quinlan and Hall, 2010). The new overlap for each iteration  
915 was calculated. The mean overlap count was used to determine enrichment. Finally, a p-value was  
916 calculated as follows:  $p\text{-value} = (X \text{ times the permutation overlap was higher than the actual overlap} /$   
917  $1000)$ . The same was applied for overlaps between gene lists, with the exception of drawing out random  
918 genes instead of shuffling coordinates.

919 To generally test a null hypothesis for randomly selected values X and Y from two populations,  
920 the probability of X being greater than Y is equal to the probability of Y being greater than X, we used a  
921 nonparametric Wilcoxon rank sum test (ggsignif R package).

922 To statistically evaluate accessibility of SATB1 peaks (Figure 3B), each SATB1 HiChIP peak  
923 was centered and extended 250 bp upstream and downstream. An average read-depth normalized ATAC-  
924 seq score was calculated for each centered peak using the UCSC executable, bigWigSummary. Scores  
925 were log<sub>10</sub> transformed. The process was repeated 100 times after random shuffling of the centered and  
926 extended peaks across the mm10 genome. The shuffleBed command from the bedtools suite (Quinlan  
927 and Hall, 2010) was used to shuffle the peaks. The average accessibility scores were calculated for the  
928 permuted and the "real" value distributions. A bootstrap p-value was calculated as: Number of randomly  
929 permuted mean values bigger than the "real" mean value / 100. In order to identify SATB1 peaks that  
930 occupied regions with reduced accessibility levels (Figure S1K), the aforementioned analysis was  
931 performed with 10 permutations. The average log<sub>10</sub> transformed read-normalized accessibility scores of  
932 the ten random permutations was used as a cutoff for picking SATB1 peaks with low accessibility levels.

### 933 3D computational modeling

934 The WT and *Satb1* cKO thymocyte Hi-C contact matrices, binned at a resolution of 20 kbp, were pre-  
935 processed by vanilla coverage normalization (Rao et al., 2014). An area delimited by two TADs (called  
936 by hicexplorer; Ramírez et al., 2018) at 150 kbp resolution and spanning chr16: 21420000-25340000)  
937 encompassing the *Bcl6* locus (chr16: 23965052-23988612) was used for 3D modeling of chromatin  
938 interactions, using TADbit Python library (Serra et al., 2017). Each contact matrix was modeled as a  
939 coarse-grained “beads-on-a-string” polymer model at an equilibrium scale of 0.01 nm/bp. First, we  
940 identified the optimal parameters to establish Z-score thresholds for attractive (*upfreq*) and repulsive  
941 (*lowfreq*) restraints, maximum inter-locus distance (*maxdist*) and maximum model physical distance,  
942 below which two model loci could be considered in contact with each other. Out of 500 models in total,  
943 we selected 100 models with the lowest amount of violated contact restraints. Next, we generated an  
944 ensemble based on the selected 100 models. Parameters were selected using a grid search approach aimed



945 to optimize the correlation between the experimental input and the ensemble, as a model-derived contact  
946 map. The selected parameters were for WT: upfreq -0.3, lowfreq -1.0, maxdist: 550, cutoff dist: 400.0  
947 and for *Satb1* cKO: upfreq 0.0, lowfreq -2.0, maxdist: 1100, cutoff dist: 800.0. We used the optimized  
948 set of parameters and based on correlation between the model and the experimental contact maps, we  
949 selected the top 5,000 models (out of 25,000 models) to generate a production ensemble. Production  
950 ensembles were well correlated with the input Hi-C contact matrices (Spearman's  $r = 0.716$  for WT and  
951  $r = 0.7877$  for *Satb1* cKO).

952 The production ensemble models were clustered using TADbit's built-in objective function and  
953 the MCL Markov clustering (Enright et al., 2002). The centroid model of the first cluster for each  
954 genotype was visualized using the UCSF Chimera molecular visualization software (Pettersen et al.,  
955 2004) at a scale of 1:4. The models were colored according to the distance from the 5'-end. The  
956 highlighted beads represent an approximation of SATB1 loop anchors derived from SATB1 HiChIP data  
957 at *Bcl6* (yellow) and its super-enhancers (black). The WT models were rotated to obtain a clear view of  
958 all relevant structures and then aligned to the *Satb1* cKO-derived models using the match command.

959 The three-dimensional structures in the production ensemble were used to calculate the distance  
960 distribution between the beads corresponding to the loci closest to the *Bcl6* locus and its proximal super-  
961 enhancer 1 (corresponding to chr16:23980000-24000000 and chr16:24240000-24260000, respectively).  
962 The resulting distributions of the WT and *Satb1* cKO data were compared using the Mann-Whitney U  
963 test and assessed for multimodality with the skinny-dip test (Maurus and Plant, 2016). The distances  
964 between *Bcl6* and its super-enhancer based on the ensemble of the 5,000 sampled models were: mean  
965 rank WT: 2616.3162; mean rank *Satb1* cKO: 7384.6838 ( $p = 0.0$ ; Mann-Whitney U test). Dip test results  
966 (distribution modes): WT: [171.205, 200.087], [200.248, 298.606] ( $p < 0.001$ ); *Satb1* cKO: [198.063,  
967 441.868].

## 968 **References**

- 969 Alvarez, J.D., Yasui, D.H., Niida, H., Joh, T., Loh, D.Y., and Kohwi-Shigematsu, T. (2000). The  
970 MAR-binding protein SATB1 orchestrates temporal and spatial expression of multiple genes during T-  
971 cell development. *Genes Dev.* *14*, 521–535.
- 972 Apostolou, E., Ferrari, F., Walsh, R.M., Bar-Nur, O., Stadtfeld, M., Cheloufi, S., Stuart, H.T., Polo,  
973 J.M., Ohsumi, T.K., Borowsky, M.L., et al. (2013). Genome-wide chromatin interactions of the Nanog  
974 locus in pluripotency, differentiation, and reprogramming. *Cell Stem Cell* *12*, 699–712.
- 975 Bailey, T.L., and Elkan, C. (1994). Fitting a mixture model by expectation maximization to discover  
976 motifs in biopolymers. *Proc. Int. Conf. Intell. Syst. Mol. Biol.* *2*, 28–36.
- 977 Balamotis, M.A., Tamberg, N., Woo, Y.J., Li, J., Davy, B., Kohwi-Shigematsu, T., and Kohwi, Y.  
978 (2012). *Satb1* ablation alters temporal expression of immediate early genes and reduces dendritic spine  
979 density during postnatal brain development. *Mol. Cell. Biol.* *32*, 333–347.
- 980 Bhattacharyya, S., Chandra, V., Vijayanand, P., and Ay, F. (2019). Identification of significant  
981 chromatin contacts from HiChIP data by FitHiChIP. *Nat. Commun.* *10*, 1–14.
- 982 Bracken, A.P., and Helin, K. (2009). Polycomb group proteins: navigators of lineage pathways led  
983 astray in cancer. *Nat. Rev. Cancer* *9*, 773–784.
- 984 Buus, T.B., Schmidt, J.D., Bonefeld, C.M., Geisler, C., and Lauritsen, J.P.H. (2016). Development of  
985 interleukin-17-producing V $\gamma$ 2 +  $\gamma\delta$  T cells is reduced by ICOS signaling in the thymus. *Oncotarget* *7*,  
986 19341–19354.
- 987 Cai, S., Han, H.-J., and Kohwi-Shigematsu, T. (2003). Tissue-specific nuclear architecture and gene  
988 expression regulated by SATB1. *Nat. Genet.* *34*, 42–51.
- 989 Cai, S., Lee, C.C., and Kohwi-Shigematsu, T. (2006). SATB1 packages densely looped,  
990 transcriptionally active chromatin for coordinated expression of cytokine genes. *Nat. Genet.* *38*, 1278–  
991 1288.
- 992 Chapuy, B., McKeown, M.R., Lin, C.Y., Monti, S., Roemer, M.G.M., Qi, J., Rahl, P.B., Sun, H.H.,  
993 Yeda, K.T., Doench, J.G., et al. (2013). Discovery and characterization of super-enhancer associated  
994 dependencies in diffuse large B-cell lymphoma. *Cancer Cell* *24*, 777–790.
- 995 Chen, L., Carico, Z., Shih, H.-Y., and Krangel, M.S. (2015). A discrete chromatin loop in the mouse  
996 *Tcr $\alpha$  - Tcr $\delta$*  locus shapes the TCR $\delta$  and TCR $\alpha$  repertoires. *Nat. Immunol.* *16*, 1085–1093.
- 997 Cho, W.-K., Spille, J.-H., Hecht, M., Lee, C., Li, C., Grube, V., and Cisse, I.I. (2018). Mediator and  
998 RNA polymerase II clusters associate in transcription-dependent condensates. *Science* *361*, 412–415.
- 999 Corces, M.R., Trevino, A.E., Hamilton, E.G., Greenside, P.G., Sinnott-Armstrong, N.A., Vesuna, S.,  
1000 Satpathy, A.T., Rubin, A.J., Montine, K.S., Wu, B., et al. (2017). An improved ATAC-seq protocol  
1001 reduces background and enables interrogation of frozen tissues. *Nat. Methods* *14*, 959–962.
- 1002 Cresswell, K.G., and Dozmorov, M.G. (2020). TADCompare: An R package for differential and  
1003 temporal analysis of topologically associated domains. *Front. Genet.* *11*.
- 1004 Crump, N.T., Ballabio, E., Godfrey, L., Thorne, R., Repapi, E., Kerry, J., Tapia, M., Hua, P.,  
1005 Lagerholm, C., Filippakopoulos, P., et al. (2021). BET inhibition disrupts transcription but retains  
1006 enhancer-promoter contact. *Nat. Commun.* *12*, 223.

- 1007 Davis, C.A., Hitz, B.C., Sloan, C.A., Chan, E.T., Davidson, J.M., Gabdank, I., Hilton, J.A., Jain, K.,  
1008 Baymuradov, U.K., Narayanan, A.K., et al. (2018). The Encyclopedia of DNA elements (ENCODE):  
1009 data portal update. *Nucleic Acids Res.* *46*, D794–D801.
- 1010 Denaxa, M., Kalaitzidou, M., Garefalaki, A., Achimastou, A., Lasrado, R., Maes, T., and Pachnis, V.  
1011 (2012). Maturation-promoting activity of SATB1 in MGE-derived cortical interneurons. *Cell Rep.* *2*,  
1012 1351–1362.
- 1013 Deng, W., Lee, J., Wang, H., Miller, J., Reik, A., Gregory, P.D., Dean, A., and Blobel, G.A. (2012).  
1014 Controlling long-range genomic interactions at a native locus by targeted tethering of a looping factor.  
1015 *Cell* *149*, 1233–1244.
- 1016 Dickinson, L.A., Joh, T., Kohwi, Y., and Kohwi-Shigematsu, T. (1992). A tissue-specific MAR/SAR  
1017 DNA-binding protein with unusual binding site recognition. *Cell* *70*, 631–645.
- 1018 Dixon, J.R., Selvaraj, S., Yue, F., Kim, A., Li, Y., Shen, Y., Hu, M., Liu, J.S., and Ren, B. (2012).  
1019 Topological domains in mammalian genomes identified by analysis of chromatin interactions. *Nature*  
1020 *485*, 376–380.
- 1021 Dunham, I., Kundaje, A., Aldred, S.F., Collins, P.J., Davis, C.A., Doyle, F., Epstein, C.B., Frietze, S.,  
1022 Harrow, J., Kaul, R., et al. (2012). An integrated encyclopedia of DNA elements in the human genome.  
1023 *Nature* *489*, 57–74.
- 1024 Durand, N.C., Shamim, M.S., Machol, I., Rao, S.S.P., Huntley, M.H., Lander, E.S., and Aiden, E.L.  
1025 (2016). Juicer provides a one-click system for analyzing loop-resolution Hi-C experiments. *Cell Syst.*  
1026 *3*, 95–98.
- 1027 Emmanuel, A.O., Arnovitz, S., Haghi, L., Mathur, P.S., Mondal, S., Quandt, J., Okoreeh, M.K.,  
1028 Maienschein-Cline, M., Khazaie, K., Dose, M., et al. (2018). TCF-1 and HEB cooperate to establish the  
1029 epigenetic and transcription profiles of CD4<sup>+</sup> CD8<sup>+</sup> thymocytes. *Nat. Immunol.* *19*, 1366–1378.
- 1030 Enright, A.J., Van Dongen, S., and Ouzounis, C.A. (2002). An efficient algorithm for large-scale  
1031 detection of protein families. *Nucleic Acids Res.* *30*, 1575–1584.
- 1032 Feng, D., Li, Z., Qin, L., and Hao, B. (2021). The role of chromatin organizer Satb1 in shaping TCR  
1033 repertoire in adult thymus. *Genome*.
- 1034 Fessing, M.Y., Mardaryev, A.N., Gdula, M.R., Sharov, A.A., Sharova, T.Y., Rapisarda, V., Gordon,  
1035 K.B., Smorodchenko, A.D., Poterlowicz, K., Ferone, G., et al. (2011). p63 regulates *Satb1* to control  
1036 tissue-specific chromatin remodeling during development of the epidermis. *J. Cell Biol.* *194*, 825–839.
- 1037 Fugmann, S.D., Lee, A.I., Shockett, P.E., Villey, I.J., and Schatz, D.G. (2000). The RAG proteins and  
1038 V(D)J recombination: complexes, ends, and transposition. *Annu. Rev. Immunol.* *18*, 495–527.
- 1039 Fujii, Y., Kumatori, A., and Nakamura, M. (2003). SATB1 makes a complex with p300 and represses  
1040 gp91phox promoter activity. *Microbiol. Immunol.* *47*, 803–811.
- 1041 Garcia-Perez, L., Famili, F., Cordes, M., Brugman, M., van Eggermond, M., Wu, H., Chouaref, J.,  
1042 Granado, D.S.L., Tiemessen, M.M., Pike-Overzet, K., et al. (2020). Functional definition of a  
1043 transcription factor hierarchy regulating T cell lineage commitment. *Sci. Adv.* *6*.

- 1044 Ghosh, R.P., Shi, Q., Yallg, L., Reddick, M.P., Nikitina, T., Zhurkin, V.B., Fordyce, P., Stasevich, T.J.,  
1045 Chang, H.Y., Greenleaf, W.J., et al. (2019). Satb1 integrates DNA binding site geometry and torsional  
1046 stress to differentially target nucleosome-dense regions. *Nat. Commun.* *10*, 3221.
- 1047 Giammartino, D.C.D., Polyzos, A., and Apostolou, E. (2020). Transcription factors: building hubs in  
1048 the 3D space. *Cell Cycle* *19*, 2395–2410.
- 1049 Gioulbasani, M., Galaras, A., Grammenoudi, S., Moulos, P., Dent, A.L., Sigvardsson, M., Hatzis, P.,  
1050 Kee, B.L., and Verykokakis, M. (2020). The transcription factor BCL-6 controls early development of  
1051 innate-like T cells. *Nat. Immunol.* 1–12.
- 1052 Haas, J.D., Ravens, S., Düber, S., Sandrock, I., Oberdörfer, L., Kashani, E., Chennupati, V., Föhse, L.,  
1053 Naumann, R., Weiss, S., et al. (2012). Development of interleukin-17-producing  $\gamma\delta$  T cells is restricted  
1054 to a functional embryonic wave. *Immunity* *37*, 48–59.
- 1055 Hao, B., Naik, A.K., Watanabe, A., Tanaka, H., Chen, L., Richards, H.W., Kondo, M., Taniuchi, I.,  
1056 Kohwi, Y., Kohwi-Shigematsu, T., et al. (2015). An anti-silencer- and SATB1-dependent chromatin  
1057 hub regulates *Rag1* and *Rag2* gene expression during thymocyte development. *J. Exp. Med.* *212*, 809–  
1058 824.
- 1059 Heinz, S., Benner, C., Spann, N., Bertolino, E., Lin, Y.C., Laslo, P., Cheng, J.X., Murre, C., Singh, H.,  
1060 and Glass, C.K. (2010). Simple combinations of lineage-determining transcription factors prime cis-  
1061 regulatory elements required for macrophage and B cell identities. *Mol. Cell* *38*, 576–589.
- 1062 Hsieh, T.-H.S., Cattoglio, C., Slobodyanyuk, E., Hansen, A.S., Rando, O.J., Tjian, R., and Darzacq, X.  
1063 (2020). Resolving the 3D landscape of transcription-linked mammalian chromatin folding. *Mol. Cell*  
1064 *78*, 539-553.e8.
- 1065 Hu, G., Cui, K., Fang, D., Hirose, S., Wang, X., Wangsa, D., Jin, W., Ried, T., Liu, P., Zhu, J., et al.  
1066 (2018). Transformation of accessible chromatin and 3D nucleome underlies lineage commitment of  
1067 early T cells. *Immunity* *48*, 227-242.e8.
- 1068 Hua, P., Badat, M., Hanssen, L.L.P., Hentges, L.D., Crump, N., Downes, D.J., Jeziorska, D.M.,  
1069 Oudelaar, A.M., Schwessinger, R., Taylor, S., et al. (2021). Defining genome architecture at base-pair  
1070 resolution. *Nature*.
- 1071 Hyjek, E., Chadburn, A., Liu, Y.F., Cesarman, E., and Knowles, D.M. (2001). BCL-6 protein is  
1072 expressed in precursor T-cell lymphoblastic lymphoma and in prenatal and postnatal thymus. *Blood* *97*,  
1073 270–276.
- 1074 Ing-Simmons, E., Seitan, V., Faure, A., Flicek, P., Carroll, T., Dekker, J., Fisher, A., Lenhard, B., and  
1075 Merckenschlager, M. (2015). Spatial enhancer clustering and regulation of enhancer-proximal genes by  
1076 cohesin. *Genome Res.* gr.184986.114.
- 1077 Jangid, R., Jayani, R., and Galande, S. (2014). Chromatin organizer SATB1 recruits Set9 histone  
1078 methyltransferase to regulate global gene expression. *Genes Genet. Syst.* *89*, 275–275.
- 1079 Ji, Y., Resch, W., Corbett, E., Yamane, A., Casellas, R., and Schatz, D.G. (2010). The in vivo pattern  
1080 of binding of RAG1 and RAG2 to antigen receptor loci. *Cell* *141*, 419–431.

- 1081 Johnson, J.L., Georgakilas, G., Petrovic, J., Kurachi, M., Cai, S., Harly, C., Pear, W.S., Bhandoola, A.,  
1082 Wherry, E.J., and Vahedi, G. (2018). Lineage-determining transcription factor TCF-1 initiates the  
1083 epigenetic identity of T cell development. *Immunity* 48, 243-257.e10.
- 1084 Johnston, R.J., Poholek, A.C., DiToro, D., Yusuf, I., Eto, D., Barnett, B., Dent, A.L., Craft, J., and  
1085 Crotty, S. (2009). Bcl6 and Blimp-1 are reciprocal and antagonistic regulators of T follicular helper cell  
1086 differentiation. *Science* 325, 1006–1010.
- 1087 Kakugawa, K., Kojo, S., Tanaka, H., Seo, W., Endo, T.A., Kitagawa, Y., Muroi, S., Tenno, M.,  
1088 Yasmin, N., Kohwi, Y., et al. (2017). Essential roles of SATB1 in specifying T lymphocyte subsets.  
1089 *Cell Rep.* 19, 1176–1188.
- 1090 Kim, S., and Shendure, J. (2019). Mechanisms of interplay between transcription factors and the 3D  
1091 genome. *Mol. Cell* 76, 306–319.
- 1092 Kim, D., Paggi, J.M., Park, C., Bennett, C., and Salzberg, S.L. (2019). Graph-based genome alignment  
1093 and genotyping with HISAT2 and HISAT-genotype. *Nat. Biotechnol.* 37, 907–915.
- 1094 Kitagawa, Y., Ohkura, N., Kidani, Y., Vandenberg, A., Hirota, K., Kawakami, R., Yasuda, K.,  
1095 Motooka, D., Nakamura, S., Kondo, M., et al. (2017). Guidance of regulatory T cell development by  
1096 Satb1-dependent super-enhancer establishment. *Nat. Immunol.* 18, 173–183.
- 1097 Knight, P.A., and Ruiz, D. (2013). A fast algorithm for matrix balancing. *IMA J. Numer. Anal.* 33,  
1098 1029–1047.
- 1099 Kohwi Shigematsu, T., Maass, K., and Bode, J. (1997). A thymocyte factor SATB1 suppresses  
1100 transcription of stably integrated matrix-attachment region-linked reporter genes. *Biochemistry* 36,  
1101 12005–12010.
- 1102 Kondo, M., Tanaka, Y., Kuwabara, T., Naito, T., Kohwi-Shigematsu, T., and Watanabe, A. (2016).  
1103 SATB1 plays a critical role in establishment of immune tolerance. *J. Immunol.* 196, 563–572.
- 1104 Kumar, P.P., Purbey, P.K., Ravi, D.S., Mitra, D., and Galande, S. (2005). Displacement of SATB1-  
1105 bound histone deacetylase 1 corepressor by the human immunodeficiency virus type 1 transactivator  
1106 induces expression of interleukin-2 and its receptor in T cells. *Mol. Cell. Biol.* 25, 1620–1633.
- 1107 Kumar, P.P., Purbey, P.K., Sinha, C.K., Notani, D., Limaye, A., Jayani, R.S., and Galande, S. (2006).  
1108 Phosphorylation of SATB1, a global gene regulator, acts as a molecular switch regulating its  
1109 transcriptional activity in vivo. *Mol. Cell* 22, 231–243.
- 1110 Langmead, B., and Salzberg, S.L. (2012). Fast gapped-read alignment with Bowtie 2. *Nat. Methods* 9,  
1111 357–359.
- 1112 Li, H., Handsaker, B., Wysoker, A., Fennell, T., Ruan, J., Homer, N., Marth, G., Abecasis, G., Durbin,  
1113 R., and Subgroup, 1000 Genome Project Data Processing (2009). The Sequence Alignment/Map format  
1114 and SAMtools. *Bioinformatics* 25, 2078–2079.
- 1115 Liao, Y., Smyth, G.K., and Shi, W. (2014). featureCounts: an efficient general purpose program for  
1116 assigning sequence reads to genomic features. *Bioinformatics* 30, 923–930.

- 1117 Lieberman-Aiden, E., Berkum, N.L. van, Williams, L., Imakaev, M., Ragoczy, T., Telling, A., Amit, I.,  
1118 Lajoie, B.R., Sabo, P.J., Dorschner, M.O., et al. (2009). Comprehensive mapping of long-range  
1119 interactions reveals folding principles of the human genome. *Science* 326, 289–293.
- 1120 Liu, J., Bramblett, D., Zhu, Q., Lozano, M., Kobayashi, R., Ross, S.R., and Dudley, J.P. (1997). The  
1121 matrix attachment region-binding protein SATB1 participates in negative regulation of tissue-specific  
1122 gene expression. *Mol. Cell. Biol.* 17, 5275–5287.
- 1123 Lopes, N., Sergé, A., Ferrier, P., and Irla, M. (2015). Thymic crosstalk coordinates medulla  
1124 organization and T-cell tolerance induction. *Front. Immunol.* 6.
- 1125 Love, M.I., Huber, W., and Anders, S. (2014). Moderated estimation of fold change and dispersion for  
1126 RNA-seq data with DESeq2. *Genome Biol.* 15, 550.
- 1127 Lun, A.T.L., and Smyth, G.K. (2015). diffHic: a Bioconductor package to detect differential genomic  
1128 interactions in Hi-C data. *BMC Bioinformatics* 16, 258.
- 1129 Lupiáñez, D.G., Kraft, K., Heinrich, V., Krawitz, P., Brancati, F., Klopocki, E., Horn, D., Kayserili, H.,  
1130 Opitz, J.M., Laxova, R., et al. (2015). Disruptions of topological chromatin domains cause pathogenic  
1131 rewiring of gene-enhancer interactions. *Cell* 161, 1012–1025.
- 1132 Maman, Y., Teng, G., Seth, R., Kleinstein, S.H., and Schatz, D.G. (2016). RAG1 targeting in the  
1133 genome is dominated by chromatin interactions mediated by the non-core regions of RAG1 and RAG2.  
1134 *Nucleic Acids Res.* 44, 9624–9637.
- 1135 Mathew, R., Mao, A., Chiang, A.H., Bertozzi-Villa, C., Bunker, J.J., Scanlon, S.T., McDonald, B.D.,  
1136 Constantinides, M.G., Hollister, K., Singer, J.D., et al. (2014). A negative feedback loop mediated by  
1137 the Bcl6–cullin 3 complex limits Tfh cell differentiation. *J. Exp. Med.* 211, 1137–1151.
- 1138 Maurus, S., and Plant, C. (2016). Skinny-dip: clustering in a sea of noise. In Proceedings of the 22nd  
1139 ACM SIGKDD International Conference on Knowledge Discovery and Data Mining, (San Francisco  
1140 California USA: ACM), pp. 1055–1064.
- 1141 Mumbach, M.R., Rubin, A.J., Flynn, R.A., Dai, C., Khavari, P.A., Greenleaf, W.J., and Chang, H.Y.  
1142 (2016). HiChIP: efficient and sensitive analysis of protein-directed genome architecture. *Nat. Methods*  
1143 13, 919–922.
- 1144 Muñoz-Ruiz, M., Sumaria, N., Pennington, D.J., and Silva-Santos, B. (2017). Thymic determinants of  
1145  $\gamma\delta$  T cell differentiation. *Trends Immunol.* 38, 336–344.
- 1146 Nora, E.P., Lajoie, B.R., Schulz, E.G., Giorgetti, L., Okamoto, I., Servant, N., Piolot, T., van Berkum,  
1147 N.L., Meisig, J., Sedat, J., et al. (2012). Spatial partitioning of the regulatory landscape of the X-  
1148 inactivation center. *Nature* 485, 381–385.
- 1149 Nora, E.P., Goloborodko, A., Valton, A.-L., Gibcus, J.H., Uebersohn, A., Abdennur, N., Dekker, J.,  
1150 Mirny, L.A., and Bruneau, B.G. (2017). Targeted degradation of CTCF decouples local insulation of  
1151 chromosome domains from genomic compartmentalization. *Cell* 169, 930–944.e22.
- 1152 Nurieva, R.I., Chung, Y., Martinez, G.J., Yang, X.O., Tanaka, S., Matskevitch, T.D., Wang, Y.-H., and  
1153 Dong, C. (2009). Bcl6 mediates the development of T follicular helper cells. *Science* 325, 1001–1005.

- 1154 Oki, S., Ohta, T., Shioi, G., Hatanaka, H., Ogasawara, O., Okuda, Y., Kawaji, H., Nakaki, R., Sese, J.,  
1155 and Meno, C. (2018). ChIP-Atlas: a data-mining suite powered by full integration of public ChIP-seq  
1156 data. *EMBO Rep.* *19*, e46255.
- 1157 Papotto, P.H., Ribot, J.C., and Silva-Santos, B. (2017). IL-17+  $\gamma\delta$  T cells as kick-starters of  
1158 inflammation. *Nat. Immunol.* *18*, 604–611.
- 1159 Perteau, M., Perteau, G.M., Antonescu, C.M., Chang, T.-C., Mendell, J.T., and Salzberg, S.L. (2015).  
1160 StringTie enables improved reconstruction of a transcriptome from RNA-seq reads. *Nat. Biotechnol.*  
1161 *33*, 290–295.
- 1162 Peters, J.-M. (2021). How DNA loop extrusion mediated by cohesin enables V(D)J recombination.  
1163 *Curr. Opin. Cell Biol.* *70*, 75–83.
- 1164 Pettersen, E.F., Goddard, T.D., Huang, C.C., Couch, G.S., Greenblatt, D.M., Meng, E.C., and Ferrin,  
1165 T.E. (2004). UCSF Chimera--a visualization system for exploratory research and analysis. *J. Comput.*  
1166 *Chem.* *25*, 1605–1612.
- 1167 Phillips, J.E., and Corces, V.G. (2009). CTCF: Master weaver of the genome. *Cell* *137*, 1194–1211.
- 1168 Purbey, P.K., Singh, S., Notani, D., Kumar, P.P., Limaye, A.S., and Galande, S. (2009). Acetylation-  
1169 dependent interaction of SATB1 and CtBP1 mediates transcriptional repression by SATB1. *Mol. Cell.*  
1170 *Biol.* *29*, 1321–1337.
- 1171 Qian, J., Wang, Q., Dose, M., Pruett, N., Kieffer-Kwon, K.-R., Resch, W., Liang, G., Tang, Z., Mathé,  
1172 E., Benner, C., et al. (2014). B cell super-enhancers and regulatory clusters recruit AID tumorigenic  
1173 activity. *Cell* *159*, 1524–1537.
- 1174 Quinlan, A.R., and Hall, I.M. (2010). BEDTools: a flexible suite of utilities for comparing genomic  
1175 features. *Bioinformatics* *26*, 841–842.
- 1176 Ramachandrareddy, H., Bouska, A., Shen, Y., Ji, M., Rizzino, A., Chan, W.C., and McKeithan, T.W.  
1177 (2010). BCL6 promoter interacts with far upstream sequences with greatly enhanced activating histone  
1178 modifications in germinal center B cells. *Proc. Natl. Acad. Sci.* *107*, 11930–11935.
- 1179 Ramírez, F., Ryan, D.P., Grüning, B., Bhardwaj, V., Kilpert, F., Richter, A.S., Heyne, S., Dündar, F.,  
1180 and Manke, T. (2016). deepTools2: a next generation web server for deep-sequencing data analysis.  
1181 *Nucleic Acids Res.* *44*, W160-165.
- 1182 Ramírez, F., Bhardwaj, V., Arrigoni, L., Lam, K.C., Grüning, B.A., Villaveces, J., Habermann, B.,  
1183 Akhtar, A., and Manke, T. (2018). High-resolution TADs reveal DNA sequences underlying genome  
1184 organization in flies. *Nat. Commun.* *9*, 189.
- 1185 Rao, S.S.P., Huntley, M.H., Durand, N.C., Stamenova, E.K., Bochkov, I.D., Robinson, J.T., Sanborn,  
1186 A.L., Machol, I., Omer, A.D., Lander, E.S., et al. (2014). A 3D map of the human genome at kilobase  
1187 resolution reveals principles of chromatin looping. *Cell* *159*, 1665–1680.
- 1188 Rao, S.S.P., Huang, S.-C., Glenn St Hilaire, B., Engreitz, J.M., Perez, E.M., Kieffer-Kwon, K.-R.,  
1189 Sanborn, A.L., Johnstone, S.E., Bascom, G.D., Bochkov, I.D., et al. (2017). Cohesin loss eliminates all  
1190 loop domains. *Cell* *171*, 305-320.e24.

- 1191 Reimand, J., Kull, M., Peterson, H., Hansen, J., and Vilo, J. (2007). g:Profiler—a web-based toolset for  
1192 functional profiling of gene lists from large-scale experiments. *Nucleic Acids Res.* *35*, W193–200.
- 1193 Robinson, M.D., McCarthy, D.J., and Smyth, G.K. (2010). edgeR: a Bioconductor package for  
1194 differential expression analysis of digital gene expression data. *Bioinformatics* *26*, 139–140.
- 1195 Rogers, C.H., Mieleczarek, O., and Corcoran, A.E. (2021). Dynamic 3D locus organization and its  
1196 drivers underpin immunoglobulin recombination. *Front. Immunol.* *11*.
- 1197 Rowley, M.J., and Corces, V.G. (2018). Organizational principles of 3D genome architecture. *Nat.*  
1198 *Rev. Genet.* *19*, 789–800.
- 1199 Rowley, M.J., Nichols, M.H., Lyu, X., Ando-Kuri, M., Rivera, I.S.M., Hermetz, K., Wang, P., Ruan,  
1200 Y., and Corces, V.G. (2017). Evolutionarily conserved principles predict 3D chromatin organization.  
1201 *Mol. Cell* *67*, 837–852.e7.
- 1202 Rowley, M.J., Poulet, A., Nichols, M., Bixler, B., Sanborn, A., Brouhard, E., Hermetz, K.,  
1203 Linsenbaum, H., Csankovszki, G., Aiden, E.L., et al. (2020). Analysis of Hi-C data using SIP  
1204 effectively identifies loops in organisms from *C. elegans* to mammals. *Genome Res.*  
1205 *gr.257832.119*.
- 1206 Ryan, R.J.H., Drier, Y., Whitton, H., Cotton, M.J., Kaur, J., Issner, R., Gillespie, S., Epstein, C.B.,  
1207 Nardi, V., Sohani, A.R., et al. (2015). Detection of enhancer-associated rearrangements reveals  
1208 mechanisms of oncogene dysregulation in B-cell lymphoma. *Cancer Discov.* *5*, 1058–1071.
- 1209 Sabari, B.R., Dall’Agnese, A., Boija, A., Klein, I.A., Coffey, E.L., Shrinivas, K., Abraham, B.J.,  
1210 Hannett, N.M., Zamudio, A.V., Manteiga, J.C., et al. (2018). Coactivator condensation at super-  
1211 enhancers links phase separation and gene control. *Science* *361*, eaar3958.
- 1212 Sakaguchi, S., Yamaguchi, T., Nomura, T., and Ono, M. (2008). Regulatory T cells and immune  
1213 tolerance. *Cell* *133*, 775–787.
- 1214 Sauerwald, N., Singhal, A., and Kingsford, C. (2020). Analysis of the structural variability of  
1215 topologically associated domains as revealed by Hi-C. *NAR Genomics Bioinforma.* *2*.
- 1216 Schep, A.N., Buenrostro, J.D., Denny, S.K., Schwartz, K., Sherlock, G., and Greenleaf, W.J. (2015).  
1217 Structured nucleosome fingerprints enable high-resolution mapping of chromatin architecture within  
1218 regulatory regions. *Genome Res.* *25*, 1757–1770.
- 1219 Schindelin, J., Arganda-Carreras, I., Frise, E., Kaynig, V., Longair, M., Pietzsch, T., Preibisch, S.,  
1220 Rueden, C., Saalfeld, S., Schmid, B., et al. (2012). Fiji: an open-source platform for biological-image  
1221 analysis. *Nat. Methods* *9*, 676–682.
- 1222 Schwarzer, W., Abdennur, N., Goloborodko, A., Pekowska, A., Fudenberg, G., Loe-Mie, Y., Fonseca,  
1223 N.A., Huber, W., Haering, C., Mirny, L., et al. (2017). Two independent modes of chromatin  
1224 organization revealed by cohesin removal. *Nature* *551*, 51–56.
- 1225 Seitan, V.C., Hao, B., Tachibana-Konwalski, K., Lavagnolli, T., Mira-Bontenbal, H., Brown, K.E.,  
1226 Teng, G., Carroll, T., Terry, A., Horan, K., et al. (2011). A role for cohesin in T cell receptor  
1227 rearrangement and thymocyte differentiation. *Nature* *476*, 467–471.



- 1228 Seitan, V.C., Faure, A.J., Zhan, Y., McCord, R.P., Lajoie, B.R., Ing-Simmons, E., Lenhard, B.,  
1229 Giorgetti, L., Heard, E., Fisher, A.G., et al. (2013). Cohesin-based chromatin interactions enable  
1230 regulated gene expression within preexisting architectural compartments. *Genome Res.* *23*, 2066–2077.
- 1231 Seo, J., Lozano, M.M., and Dudley, J.P. (2005). Nuclear matrix binding regulates SATB1-mediated  
1232 transcriptional repression. *J. Biol. Chem.* *280*, 24600–24609.
- 1233 Serra, F., Baù, D., Goodstadt, M., Castillo, D., Filion, G.J., and Marti-Renom, M.A. (2017). Automatic  
1234 analysis and 3D-modelling of Hi-C data using TADbit reveals structural features of the fly chromatin  
1235 colors. *PLOS Comput. Biol.* *13*, e1005665.
- 1236 Servant, N., Varoquaux, N., Lajoie, B.R., Viara, E., Chen, C.-J., Vert, J.-P., Heard, E., Dekker, J., and  
1237 Barillot, E. (2015). HiC-Pro: an optimized and flexible pipeline for Hi-C data processing. *Genome*  
1238 *Biol.* *16*, 259.
- 1239 Shen, Y., Yue, F., McCleary, D.F., Ye, Z., Edsall, L., Kuan, S., Wagner, U., Dixon, J., Lee, L.,  
1240 Lobanenkov, V.V., et al. (2012). A map of the cis -regulatory sequences in the mouse genome. *Nature*  
1241 *488*, 116–120.
- 1242 Shih, H.-Y., Verma-Gaur, J., Torkamani, A., Feeney, A.J., Galjart, N., and Krangel, M.S. (2012). *Tcra*  
1243 gene recombination is supported by a *Tcra* enhancer- and CTCF-dependent chromatin hub. *Proc. Natl.*  
1244 *Acad. Sci. U. S. A.* *109*, E3493-3502.
- 1245 Spilianakis, C.G., and Flavell, R.A. (2004). Long-range intrachromosomal interactions in the T helper  
1246 type 2 cytokine locus. *Nat. Immunol.* *5*, 1017–1027.
- 1247 Spilianakis, C.G., Lalioti, M.D., Town, T., Lee, G.R., and Flavell, R.A. (2005). Interchromosomal  
1248 associations between alternatively expressed loci. *Nature* *435*, 637–645.
- 1249 Stadhouders, R., Vidal, E., Serra, F., Di Stefano, B., Le Dily, F., Quilez, J., Gomez, A., Collombet, S.,  
1250 Berenguer, C., Cuartero, Y., et al. (2018). Transcription factors orchestrate dynamic interplay between  
1251 genome topology and gene regulation during cell reprogramming. *Nat. Genet.* *50*, 238–249.
- 1252 Stadhouders, R., Filion, G.J., and Graf, T. (2019). Transcription factors and 3D genome conformation  
1253 in cell-fate decisions. *Nature* *569*, 345–354.
- 1254 Sun, Z., Unutmaz, D., Zou, Y.-R., Sunshine, M.J., Pierani, A., Brenner-Morton, S., Mebius, R.E., and  
1255 Littman, D.R. (2000). Requirement for ROR $\gamma$  in thymocyte survival and lymphoid organ development.  
1256 *Science* *288*, 2369–2373.
- 1257 Sunkara, K.P., Gupta, G., Hansbro, P.M., Dua, K., and Bebawy, M. (2018). Functional relevance of  
1258 SATB1 in immune regulation and tumorigenesis. *Biomed. Pharmacother.* *104*, 87–93.
- 1259 Teng, G., Maman, Y., Resch, W., Kim, M., Yamane, A., Qian, J., Kieffer-Kwon, K.-R., Mandal, M., Ji,  
1260 Y., Meffre, E., et al. (2015). RAG represents a widespread threat to the lymphocyte genome. *Cell* *162*,  
1261 751–765.
- 1262 Vinuesa, C.G., Linterman, M.A., Yu, D., and MacLennan, I.C.M. (2016). Follicular helper T cells.  
1263 *Annu. Rev. Immunol.* *34*, 335–368.
- 1264 Wang, Z., Yang, X., Chu, X., Zhang, J., Zhou, H., Shen, Y., and Long, J. (2012). The structural basis  
1265 for the oligomerization of the N-terminal domain of SATB1. *Nucleic Acids Res.* *40*, 4193–4202.

- 1266 Wang, Z., Yang, X., Guo, S., Yang, Y., Su, X.-C., Shen, Y., and Long, J. (2014). Crystal structure of  
1267 the ubiquitin-like domain-CUT repeat-like tandem of special AT-rich sequence binding protein 1  
1268 (SATB1) reveals a coordinating DNA-binding mechanism. *J. Biol. Chem.* *289*, 27376–27385.
- 1269 Wei, Z., Zhang, W., Fang, H., Li, Y., and Wang, X. (2018). esATAC: an easy-to-use systematic  
1270 pipeline for ATAC-seq data analysis. *Bioinformatics* *34*, 2664–2665.
- 1271 Weintraub, A.S., Li, C.H., Zamudio, A.V., Sigova, A.A., Hannett, N.M., Day, D.S., Abraham, B.J.,  
1272 Cohen, M.A., Nabet, B., Buckley, D.L., et al. (2017). YY1 is a structural regulator of enhancer-  
1273 promoter loops. *Cell* *171*, 1573-1588.e28.
- 1274 Wu, H., Deng, Y., Zhao, M., Zhang, J., Zheng, M., Chen, G., Li, L., He, Z., and Lu, Q. (2018).  
1275 Molecular control of follicular helper T cell development and differentiation. *Front. Immunol.* *9*.
- 1276 Yasui, D., Miyano, M., Cai, S.T., Varga-Weisz, P., and Kohwi-Shigematsu, T. (2002). SATB1 targets  
1277 chromatin remodelling to regulate genes over long distances. *Nature* *419*, 641–645.
- 1278 Yu, D., Rao, S., Tsai, L.M., Lee, S.K., He, Y., Sutcliffe, E.L., Srivastava, M., Linterman, M., Zheng,  
1279 L., Simpson, N., et al. (2009). The transcriptional repressor Bcl-6 directs T follicular helper cell lineage  
1280 commitment. *Immunity* *31*, 457–468.
- 1281 Zelenka, T., and Spilianakis, C. (2020). SATB1-mediated chromatin landscape in T cells. *Nucleus* *11*,  
1282 117–131.
- 1283 Zelenka, T., Tzerpos, P., Panagopoulos, G., Tsolis, K.C., Papamatheakis, D., Papadakis, V.M., Stanek,  
1284 D., and Spilianakis, C.G. (Submitted). Physiological importance of SATB1 phase transitions and  
1285 means of their regulation.
- 1286 Zhao, H., Sun, Z., Wang, J., Huang, H., Kocher, J.-P., and Wang, L. (2014). CrossMap: a versatile tool  
1287 for coordinate conversion between genome assemblies. *Bioinforma. Oxf. Engl.* *30*, 1006–1007.
- 1288 Zuberbuehler, M.K., Parker, M.E., Wheaton, J.D., Espinosa, J.R., Salzler, H.R., Park, E., and Ciofani,  
1289 M. (2019). The transcription factor c-Maf is essential for the commitment of IL-17-producing  $\gamma\delta$  T  
1290 cells. *Nat. Immunol.* *20*, 73–85.
- 1291
- 1292

## 1293 **Figure legends**

### 1294 **Figure 1. Autoimmune-like phenotype of the *Satb1* cKO mouse**

1295 (A) Anchors of regulatory H3K27ac HiChIP loops in murine WT thymocytes are enriched for the ChIP-  
1296 seq peaks of the factors depicted in the table. The analysis was based on the ChIP-Atlas (Oki et al., 2018),  
1297 thus the datasets and underlying study ID match SRA databases.

1298 (B) Distribution of fold-enrichment of all available ChIP-seq datasets based on ChIP-Atlas (Oki et al.,  
1299 2018) at WT H3K27ac loop anchors over random permutation and the corresponding p values. All  
1300 available SATB1 ChIP-seq datasets (highlighted in red) evinced enrichment at the anchors of regulatory  
1301 chromatin loops.

1302 (C) Flow cytometry in cell populations of the thymus and the spleen for the expression of CD4 and CD8  
1303 cell surface markers as well as CD62L (naiveness marker) and CD44 (lymphocyte activation marker).  
1304 Used animals were divided into young (45±11 days; 6 WT, 6 *Satb1* cKO) and old (179±35 days; 7 WT,  
1305 9 *Satb1* cKO) age categories. Only young animals were used for analysis of thymus due to its  
1306 deterioration in old animals. Three young animals for each genotype were used for CD62 / CD44  
1307 analysis.

1308 (D) Differences in the cytokine milieu in the blood serum of WT and *Satb1* cKO animals measured with  
1309 bead-based immunoassay, point to an elevated Th17 response and increased inflammatory cytokines.

1310 (E) *Satb1* cKO animals display an autoimmune-like phenotype. T cells infiltrated peripheral organs,  
1311 including pancreas, which resulted into damaged islets of Langerhans and consequently impaired glucose  
1312 metabolism. BF indicates steady-state glucose levels, before 6 hour fasting period.

1313 (F) WT pancreas sections were incubated with serum from either WT or *Satb1* cKO animals to detect  
1314 the presence of autoantibodies. Scale bar in all images is 100 µm.

1315 In (C, D and E) if present, the horizontal lines inside violins represent the 25<sup>th</sup>, 50<sup>th</sup> and 75<sup>th</sup> percentiles.  
1316 Red circle represents mean ± s.d. P values by Wilcoxon rank sum test. In (D and E), SKO represents  
1317 *Satb1*<sup>fl/fl</sup>*Cd4*-Cre<sup>+</sup> animals.

1318 **Figure 2. T cell chromatin organization mediated by SATB1 and CTCF**

1319 (A) Comparison of WT and *Satb1* cKO Hi-C heatmaps of chromosome 11 indicates no major changes at  
1320 high order chromatin level in murine thymocytes.

1321 (B) diffHic analysis (Lun and Smyth, 2015) of differentially interacting chromatin areas indicates that  
1322 CTCF contributes more strongly to the higher order chromatin organization of the murine T cell genome  
1323 than SATB1.

1324 (C) SATB1-mediated loops highly intersect with CTCF-mediated loops detected by HiChIP. For the  
1325 intersection, the outer coordinates of left and right loop anchors were used.

1326 (D) Overlap score between SATB1 and CTCF loops calculated as (number of overlapping bp) / (bp size  
1327 of a loop). For example, for the SATB1-labeled violin, a score of 1.0 indicates either 100% overlap or  
1328 engulfment of a SATB1-mediated loop in a loop mediated by CTCF. A score of 0.0 indicates no overlap.  
1329 The plot indicates that the majority of the SATB1 loops were engulfed in CTCF loops. The same  
1330 approach was repeated for randomly shuffled loops. *P* values by Wilcoxon rank sum test.

1331 (E) SATB1 preferentially binds nucleosomes unlike CTCF.

1332 (F) SATB1 loop anchors overlap with genes enriched for immune system-related categories. CTCF-  
1333 mediated loops display more widespread coverage of intersecting genes thus the most enriched gene  
1334 ontology pathways belong mostly to general cellular processes.

1335 **Figure 3. SATB1-mediated chromatin loops positively regulate gene expression**

1336 (A) Immunofluorescence analysis with confocal microscopy of WT and *Satb1* cKO thymocytes stained  
1337 with antibodies against HP1 $\alpha$  and RNA Pol II. The nuclei of *Satb1* cKO thymocytes had stronger HP1 $\alpha$   
1338 signal, suggesting a more repressed nuclear environment. The values in the graph represent an integrated  
1339 signal density from summed z-stacks. SKO represents *Satb1*<sup>fl/fl</sup>*Cd4*-Cre<sup>+</sup> animals. The horizontal lines  
1340 inside violins represent the 25<sup>th</sup>, 50<sup>th</sup> and 75<sup>th</sup> percentiles. The red circle represents the mean  $\pm$  s.d. *P*  
1341 values by Wilcoxon rank sum test. Scale bar 5  $\mu$ m.

1342 (B) ATAC-seq signal indicates higher chromatin accessibility at WT SATB1 binding sites than expected  
1343 by chance (i.e, randomly shuffled SATB1 binding sites). 100 randomizations were used to for statistical  
1344 evaluation (bootstrap p-value = 0). Two representative random distributions are depicted in the figure.

1345 (C) Chromatin accessibility at SATB1 binding sites is decreased in *Satb1* cKO.

1346 (D) Log2 fold change of chromatin accessibility indicates the highest accessibility drop in *Satb1* cKO  
1347 being at the TSS of genes.

1348 (E) Inference tree systematically probing all options of SATB1 binding and looping as well as their  
1349 impact on gene expression. The x-axis indicates the ranges of log2 fold change RNA-seq values. For  
1350 example, 5% of the most underexpressed genes in *Satb1* cKO represent ~20% of genes (y-axis) found in  
1351 anchors of SATB1-mediated loops connected to an enhancer (first red arrow). The red arrows highlight  
1352 the disruption of the normal distribution of differentially expressed genes in the respective ranges that is  
1353 present in SATB1-mediated loops. Differentially expressed genes that do not overlap with anchors of  
1354 SATB1 loops display a normal distribution – reflecting the respective log2 fold change ranges (the three  
1355 rightmost graphs).

1356 (F) SATB1-mediated loops connecting genes to enhancers are about three-fold enriched compared to  
1357 CTCF loops.

1358 (G) SATB1-mediated loops connected to enhancers evince enriched interaction signal between left and  
1359 right anchor in WT Hi-C data, which is deregulated in *Satb1* cKO. Aggregate peak analysis (APA; Rao  
1360 et al., 2014) was calculated and visualized by SIPMeta (Rowley et al., 2020).

1361 **Figure 4. SATB1 mediates promoter-enhancer communication of critical immune-related genes**

1362 (A) Positive correlation (Spearman's  $\rho = 0.26$ ) between gene expression changes and the difference  
1363 between H3K27ac overinteracting and underinteracting loops in WT thymocytes compared to *Satb1*  
1364 cKO. Negative values on the x-axis represent prevailing H3K27ac loops that were lost or diminished in  
1365 *Satb1* cKO, whereas positive numbers refer to gained H3K27ac loops in the knockout.

1366 (B) Log2 fold change expression values of genes that were present in anchors of H3K27ac HiChIP loops  
1367 underinteracting in *Satb1* cKO and which also did or did not intersect with SATB1/CTCF-mediated  
1368 loops. An equal number of underinteracting loops that did not overlap with SATB1/CTCF-mediated  
1369 loops were randomly generated. *P* values by Wilcoxon rank sum test.

1370 (C) The same as in (B) visualized for H3K27ac HiChIP loops overinteracting in *Satb1* cKO.

1371 (D) The *Bcl6* gene is connected by two SATB1 loops to its super-enhancer regions. Figure depicts the  
1372 shorter SATB1 loop connecting *Bcl6* (same loop anchor for both loops; chr16:23985000-23990000) with  
1373 the more proximal super-enhancer region 1 (SE1; chr16:24245000-24250000) and a part of the larger  
1374 SATB1 loop (chr16:24505000-24510000). In *Satb1* cKO, these interactions were lost as seen in the Hi-  
1375 C data analysis (heatmap in the top). Legend: th – thymocytes, DP – CD4<sup>+</sup>CD8<sup>+</sup> T cells, RKO –  
1376 *Rad21*<sup>fl/fl</sup>*Cd4*-Cre<sup>+</sup> and SKO – *Satb1*<sup>fl/fl</sup>*Cd4*-Cre<sup>+</sup>.

1377 (E) Computational 3D modeling utilizing the WT Hi-C and *Satb1* cKO Hi-C data, to visualize the  
1378 proximity between the *Bcl6* gene body and its two super-enhancer regions / SATB1 loop anchors. The  
1379 black beads represent the edge of super-enhancer regions demarcated by the SATB1 loop anchors [SE1  
1380 and the short loop are also depicted in (D)]. Color gradient represents linear genomic position along the  
1381 locus.

1382 (F) Hematoxylin-Eosin staining of WT and *Satb1* cKO spleen sections revealed disturbed germinal  
1383 centers in the knockout.

## 1384 **Figure 5. TCR $\alpha$ gene locus chromatin organization depends on SATB1**

1385 (A) Genomic tracks as well as SATB1 and CTCF HiChIP loops at the T cell receptor alpha locus (TCR $\alpha$ ).  
1386 The bottom green genomic tracks of log2 fold change RNA-seq values summarize the overall  
1387 deregulation of the TCR $\alpha$  locus, with variable regions (*Trav* genes) being mostly underexpressed, TCR $\delta$   
1388 locus overexpressed and TCR $\alpha$  joining regions (*Traj* genes) displaying geometrically symmetric  
1389 deregulation splitting the region into over- and under-expressed in *Satb1* cKO cells (magenta arrow).  
1390 This deregulation was markedly correlated with the presence of SATB1-mediated loops. Note especially

1391 the region of joining genes which manifests a deregulation similar to previous reports from *Satb1*  
1392 depleted animals (Feng et al., 2021; Hao et al., 2015). Both SATB1 and CTCF loops displayed a tendency  
1393 to connect the TCR enhancer (green arrow) to the regions inside the locus. The presented loops were  
1394 called with low stringency parameters and with a different set of binding sites compared to the rest of  
1395 our study due to technical details explained in the methods section.

1396 (B) SATB1 mediates promoter-enhancer regulatory loops controlling the expression of both *Rag1* and  
1397 *Rag2* genes.

1398 (C) RNA levels of *Rag1* and *Rag2* genes in WT and *Satb1* cKO thymocytes.

1399 (D) Protein levels of RAG1 (1:2500, Abcam ab172637) and RAG2 (1:100, Santa Cruz Biotechnology  
1400 sc-517209) were just marginally affected in the *Satb1* cKO thymocytes (beta Actin as a loading control;  
1401 1:500, ORIGENE TA811000).

1402 (E) Differential H3K27ac HiChIP loops reflected the deregulation of *Traj* regions.

1403 In (A, B and D), H3K27ac datasets originate from CD4<sup>+</sup>CD8<sup>+</sup> T cells, all the other datasets from  
1404 thymocytes. RKO denotes *Rad21<sup>fl/fl</sup>Cd4-Cre<sup>+</sup>* and SKO – *Satb1<sup>fl/fl</sup>Cd4-Cre<sup>+</sup>*.

1405 **Figure 6. Deregulated expression of genes encoding adhesion molecules and receptors in the *Satb1***  
1406 **cKO thymocytes**

1407 (A) Pathway analysis for the genes differentially expressed in the *Satb1* cKO compared to WT  
1408 thymocytes as deduced by RNA-seq. Biological adhesion was the top gene ontology pathway in *Satb1*  
1409 cKO underexpressed genes.

1410 (B) Important thymic receptors were underexpressed in *Satb1* cKO.

1411 (C) *Cd28* gene regulated via SATB1-mediated promoter-enhancer chromatin loops. There was a SATB1-  
1412 mediated regulatory loop and correspondingly increased interactions in the WT Hi-C which were  
1413 decreased in the *Satb1* cKO Hi-C. Legend: th – thymocytes, DP – CD4<sup>+</sup>CD8<sup>+</sup> T cells, RKO –  
1414 *Rad21<sup>fl/fl</sup>Cd4-Cre<sup>+</sup>* and SKO – *Satb1<sup>fl/fl</sup>Cd4-Cre<sup>+</sup>*.

1415 (D) Thymic sections displaying a disrupted thymic environment in the *Satb1* cKO. Thymic cryosections  
1416 stained with Hematoxylin & Eosin (H&E) and with methylene blue indicated the decreased cellular  
1417 density and decreased contacts between cells in the *Satb1* cKO compared to WT thymus. The  
1418 transmission electron microscopy images are representative of four biological replicates to underscore  
1419 the missing cellular contacts between the *Satb1* cKO cells.

1420 (E) Number of thymocytes in WT and *Satb1* cKO mice. The horizontal lines inside violins represent the  
1421 25<sup>th</sup>, 50<sup>th</sup> and 75<sup>th</sup> percentiles. The red circle represents the mean  $\pm$  s.d. *P* values by Wilcoxon rank sum  
1422 test.

1423 (F) The thymus of the *Satb1* cKO animals contained more apoptotic and necrotic cells as deduced by  
1424 flow cytometry analysis using Annexin V and propidium iodide staining.

1425 (G) Neonatal thymi from WT and *Satb1* cKO mice were cultivated for 30 hours. An image was taken  
1426 every hour to monitor the rate of T cell exit from the thymus. The error bars represent the standard error  
1427 of the mean.

1428



**Figure 1**

**A**

| study ID   | factor | num of overlaps | overlaps/total | overlaps/random | log pval | log pval | fold enrichment |
|------------|--------|-----------------|----------------|-----------------|----------|----------|-----------------|
| SRX018807  | Rag2   | 3101            | 1567/10841     | 68/10841        | -324     | -324     | 22.1439         |
| SRX1046534 | Rag1   | 6812            | 2923/10841     | 132/10841       | -324     | -324     | 21.9588         |
| SRX018809  | Rag2   | 4334            | 2130/10841     | 97/10841        | -324     | -324     | 21.413          |
| SRX2880138 | Bcl11b | 3966            | 1970/10841     | 92/10841        | -324     | -324     | 21.1089         |
| SRX2379960 | Satb1  | 4351            | 2132/10841     | 101/10841       | -324     | -324     | 18.1189         |
| SRX1046543 | Rag2   | 12811           | 4421/10841     | 244/10841       | -324     | -324     | 21.2393         |
| SRX1649983 | Bcl11b | 5217            | 2485/10841     | 117/10841       | -324     | -324     | 19.6727         |
| SRX275397  | Tcf7   | 4814            | 2164/10841     | 110/10841       | -324     | -324     | 18.4505         |
| SRX1649982 | Bcl11b | 14636           | 5775/10841     | 313/10841       | -324     | -324     | 18.4227         |
| SRX1677234 | Bcl11b | 13309           | 5361/10841     | 291/10841       | -324     | -324     |                 |

**B**

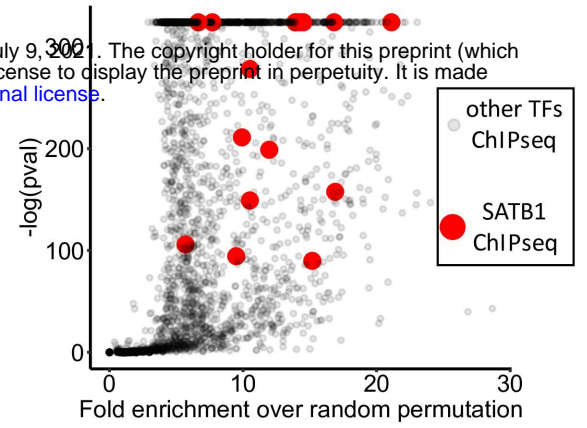

**C**

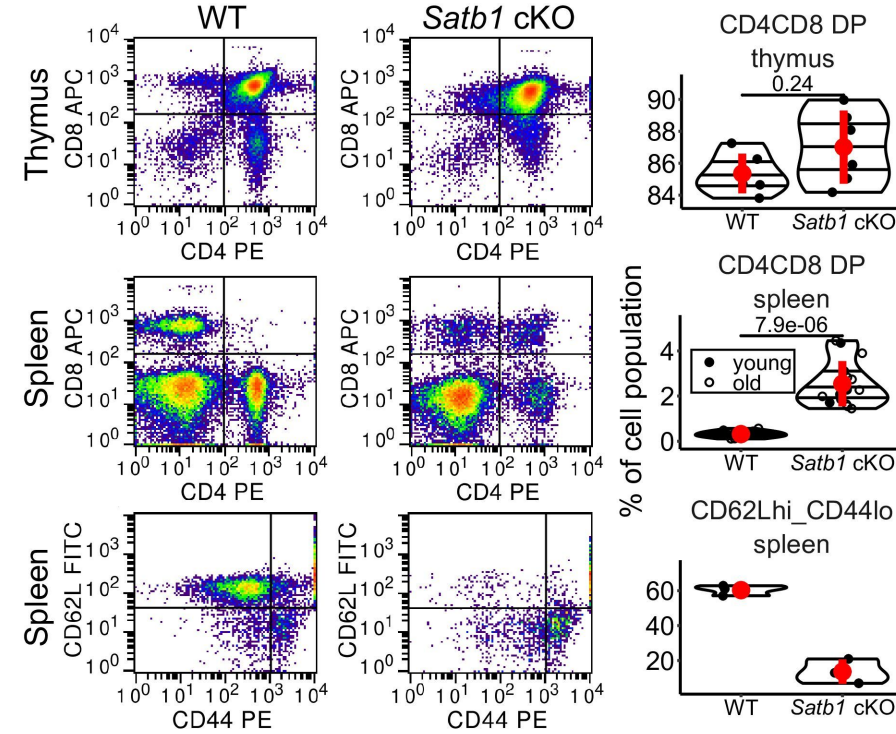

**D**

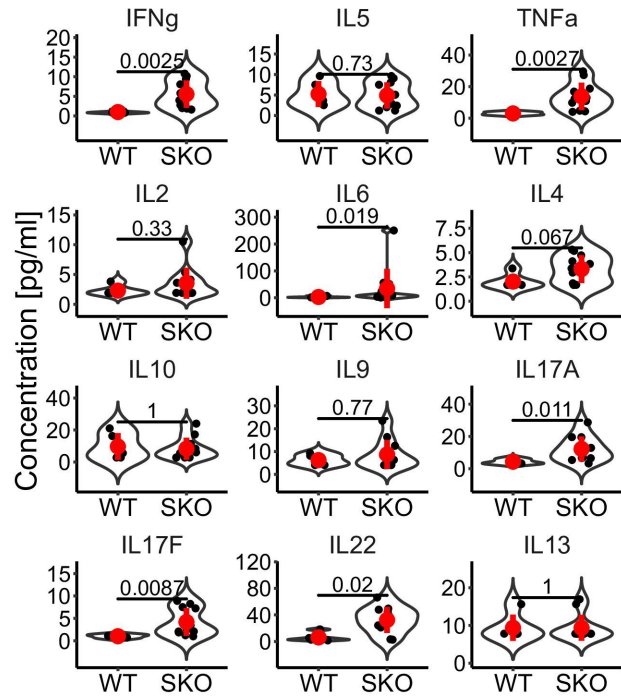

**E**

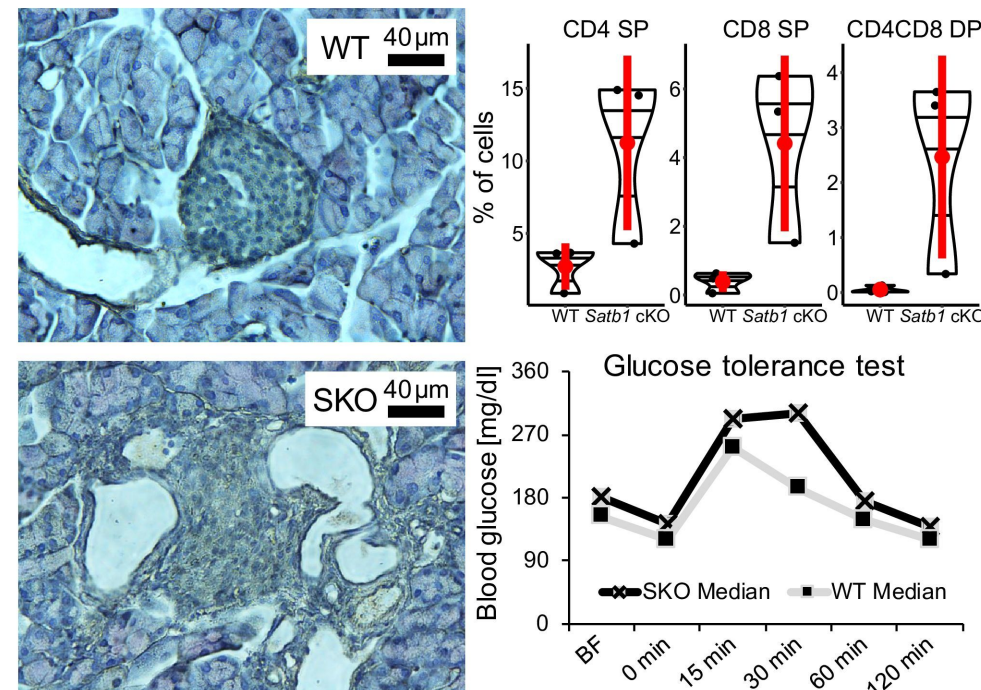

**F**

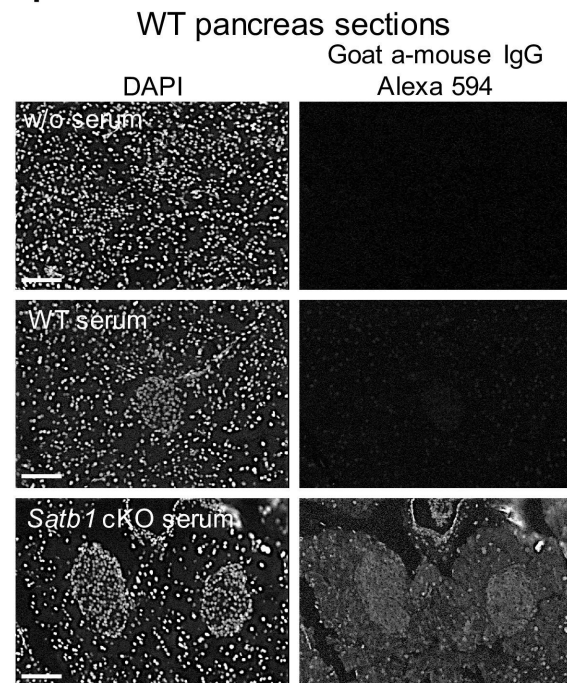

**Figure 2**

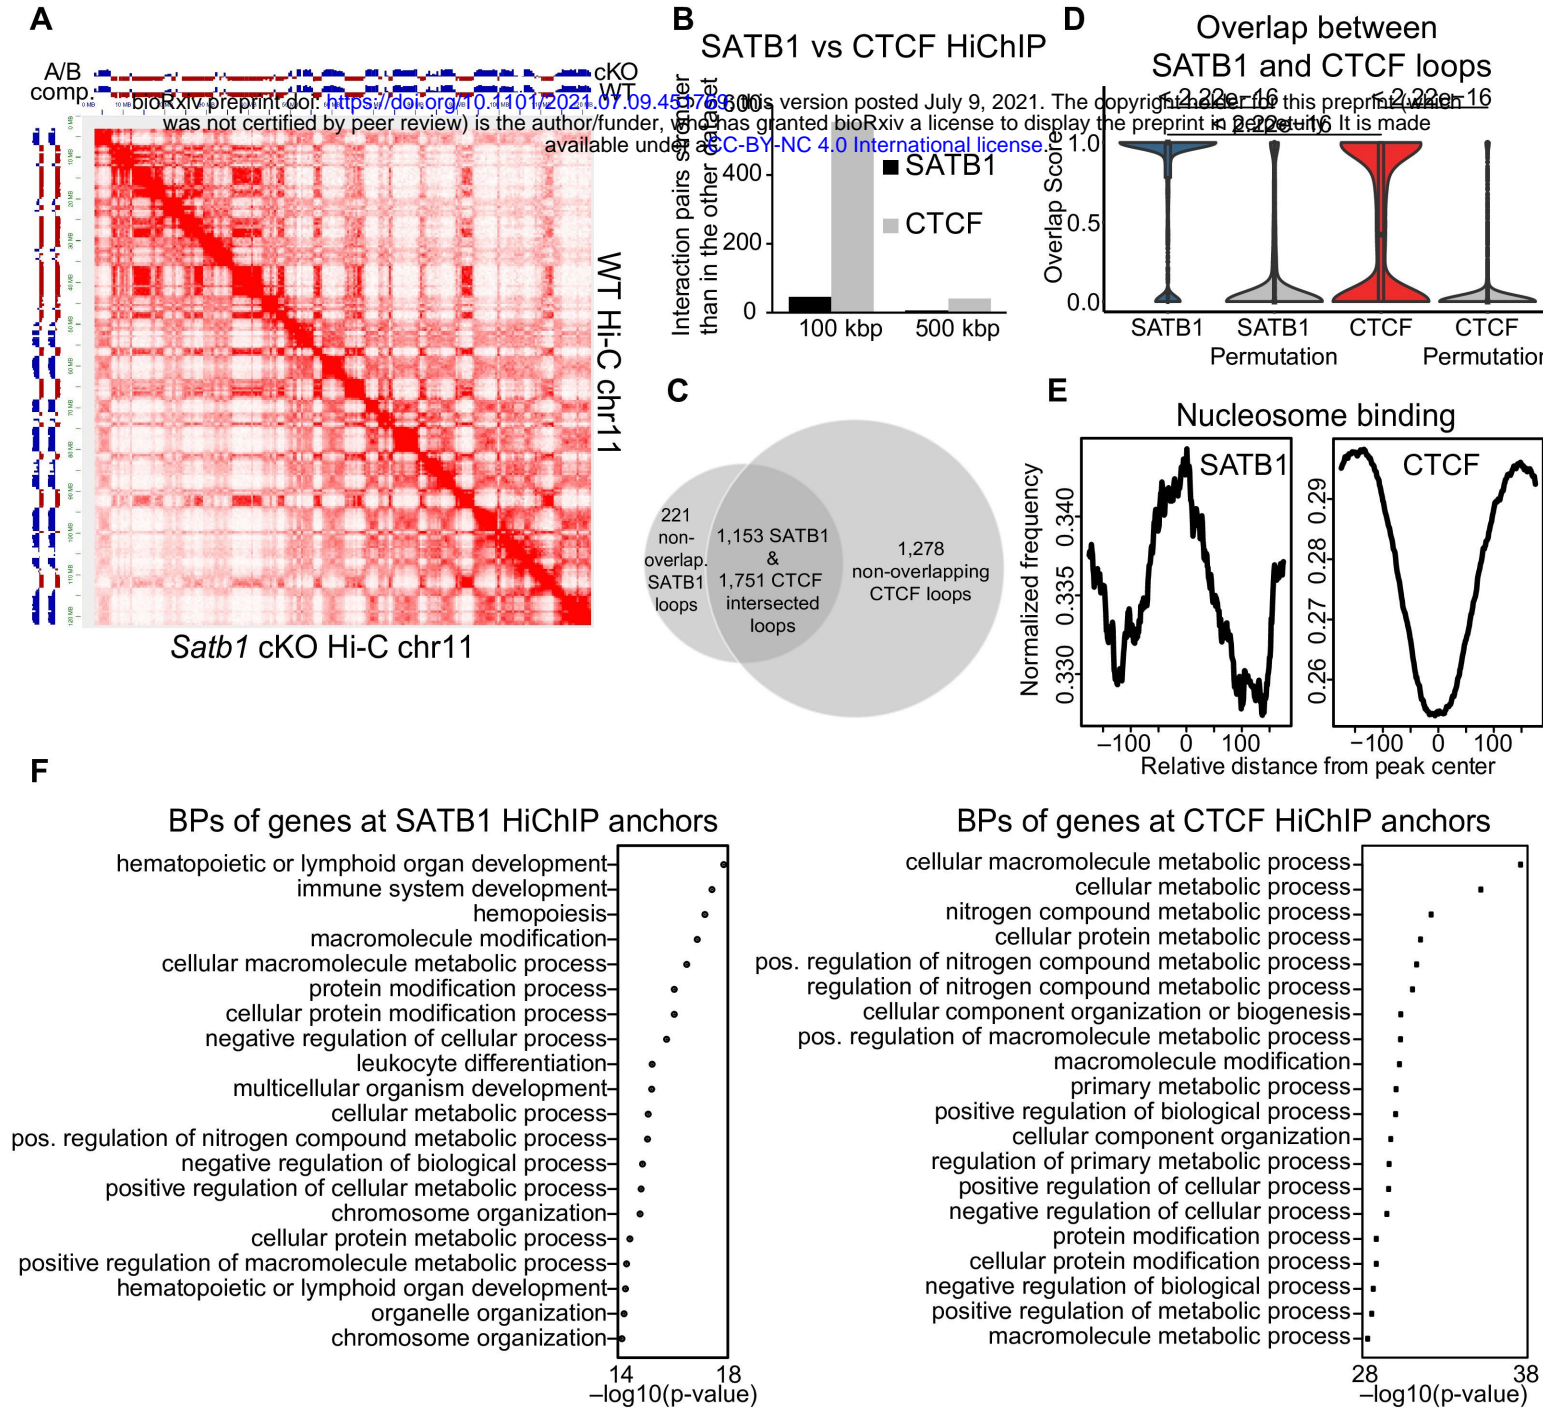

**Figure 3**

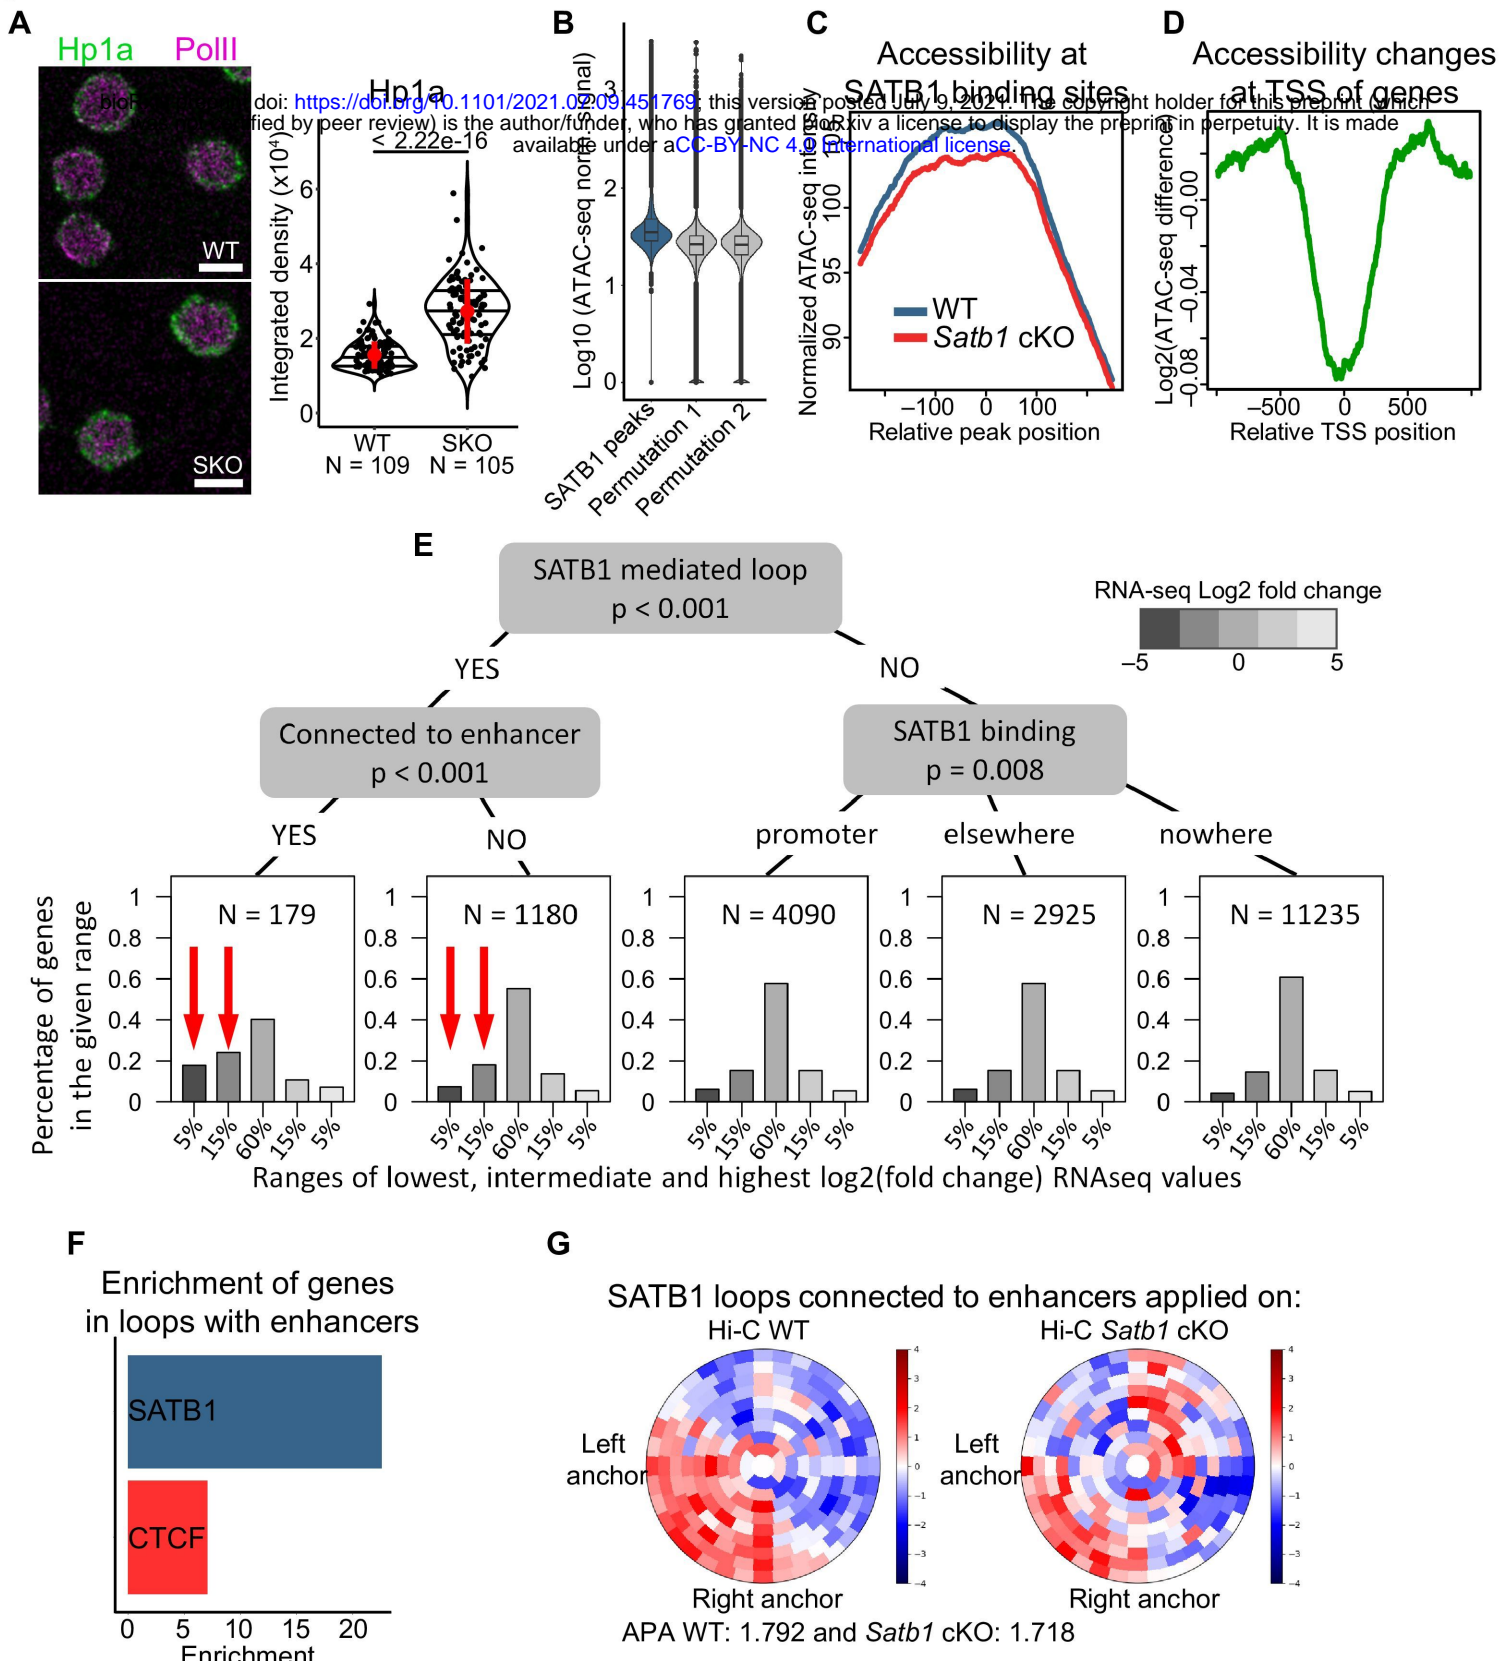

doi: <https://doi.org/10.1101/2021.07.09.451769>; this version posted July 9, 2021. The copyright holder for this preprint (which was not certified by peer review) is the author/funder, who has granted bioRxiv a license to display the preprint in perpetuity. It is made available under aCC-BY-NC 4.0 International license.

**Figure 4**

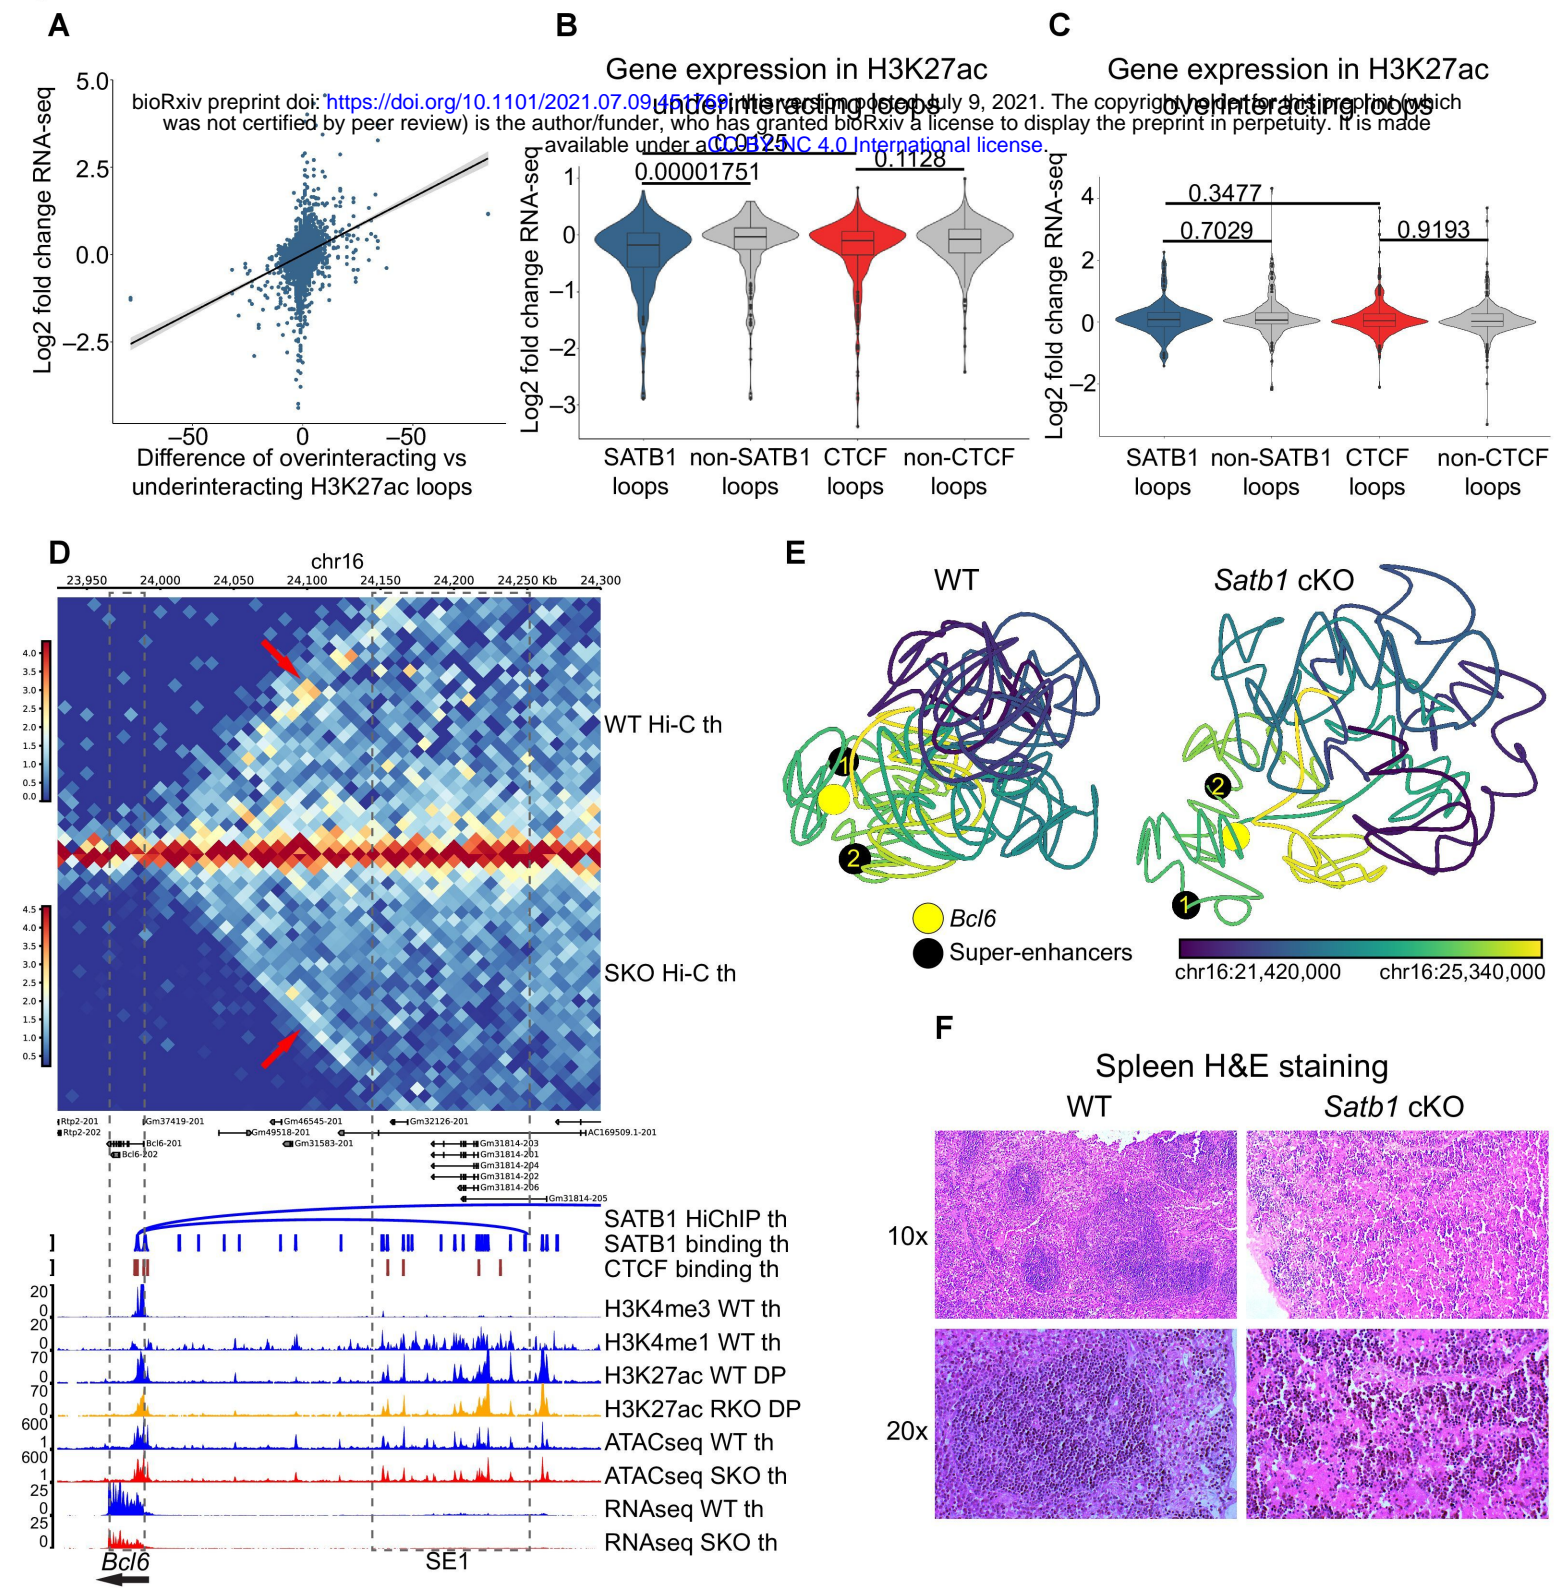

**Figure 5**

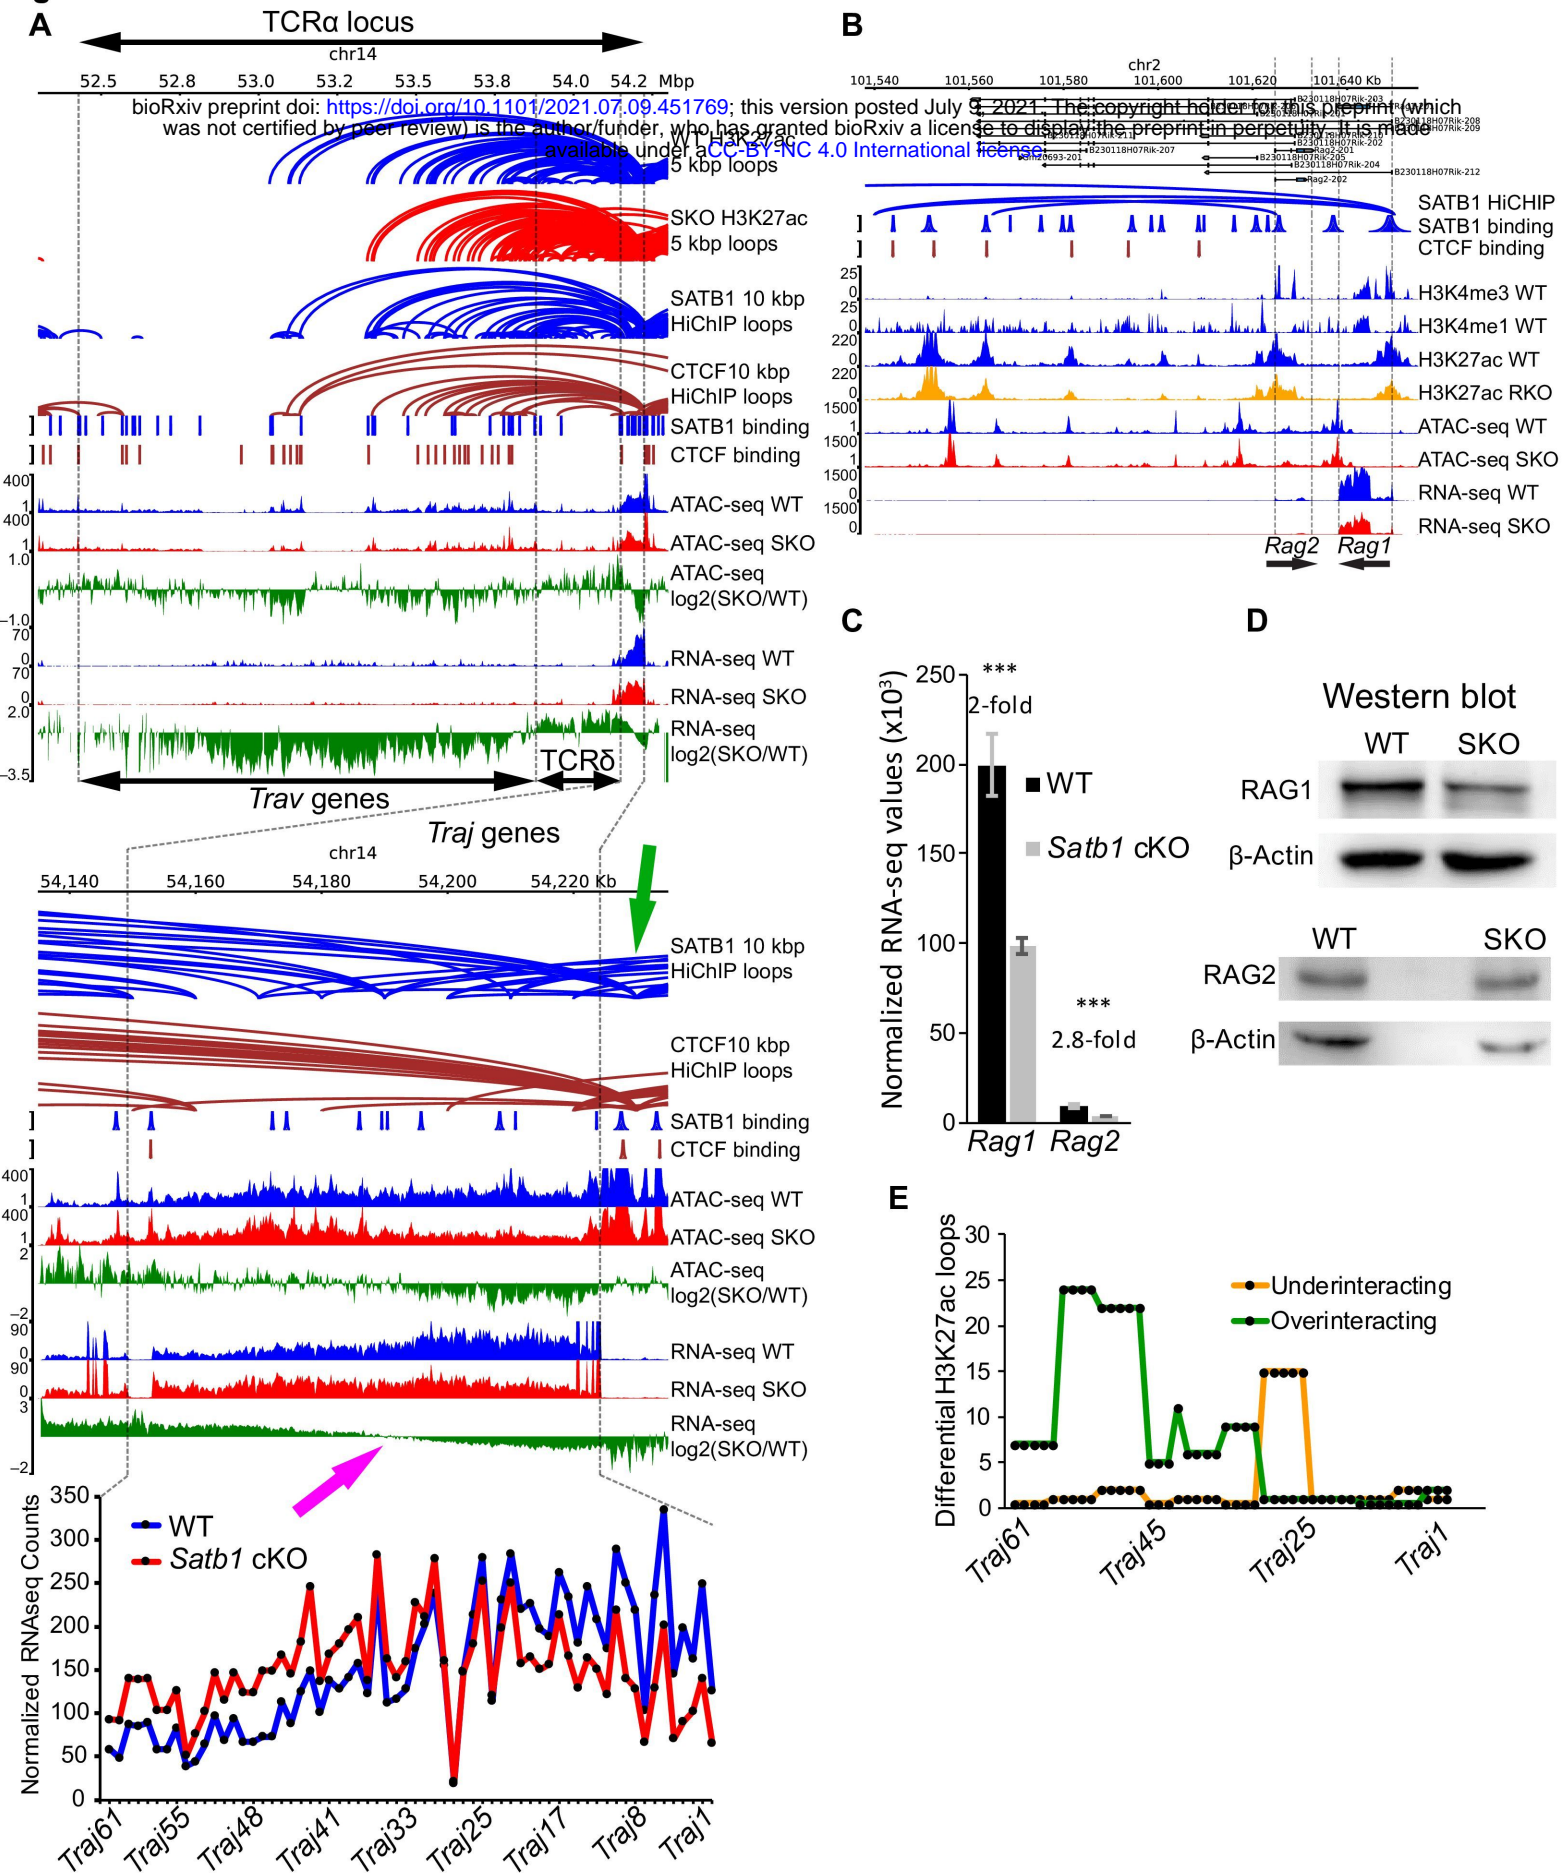

**Figure 6**

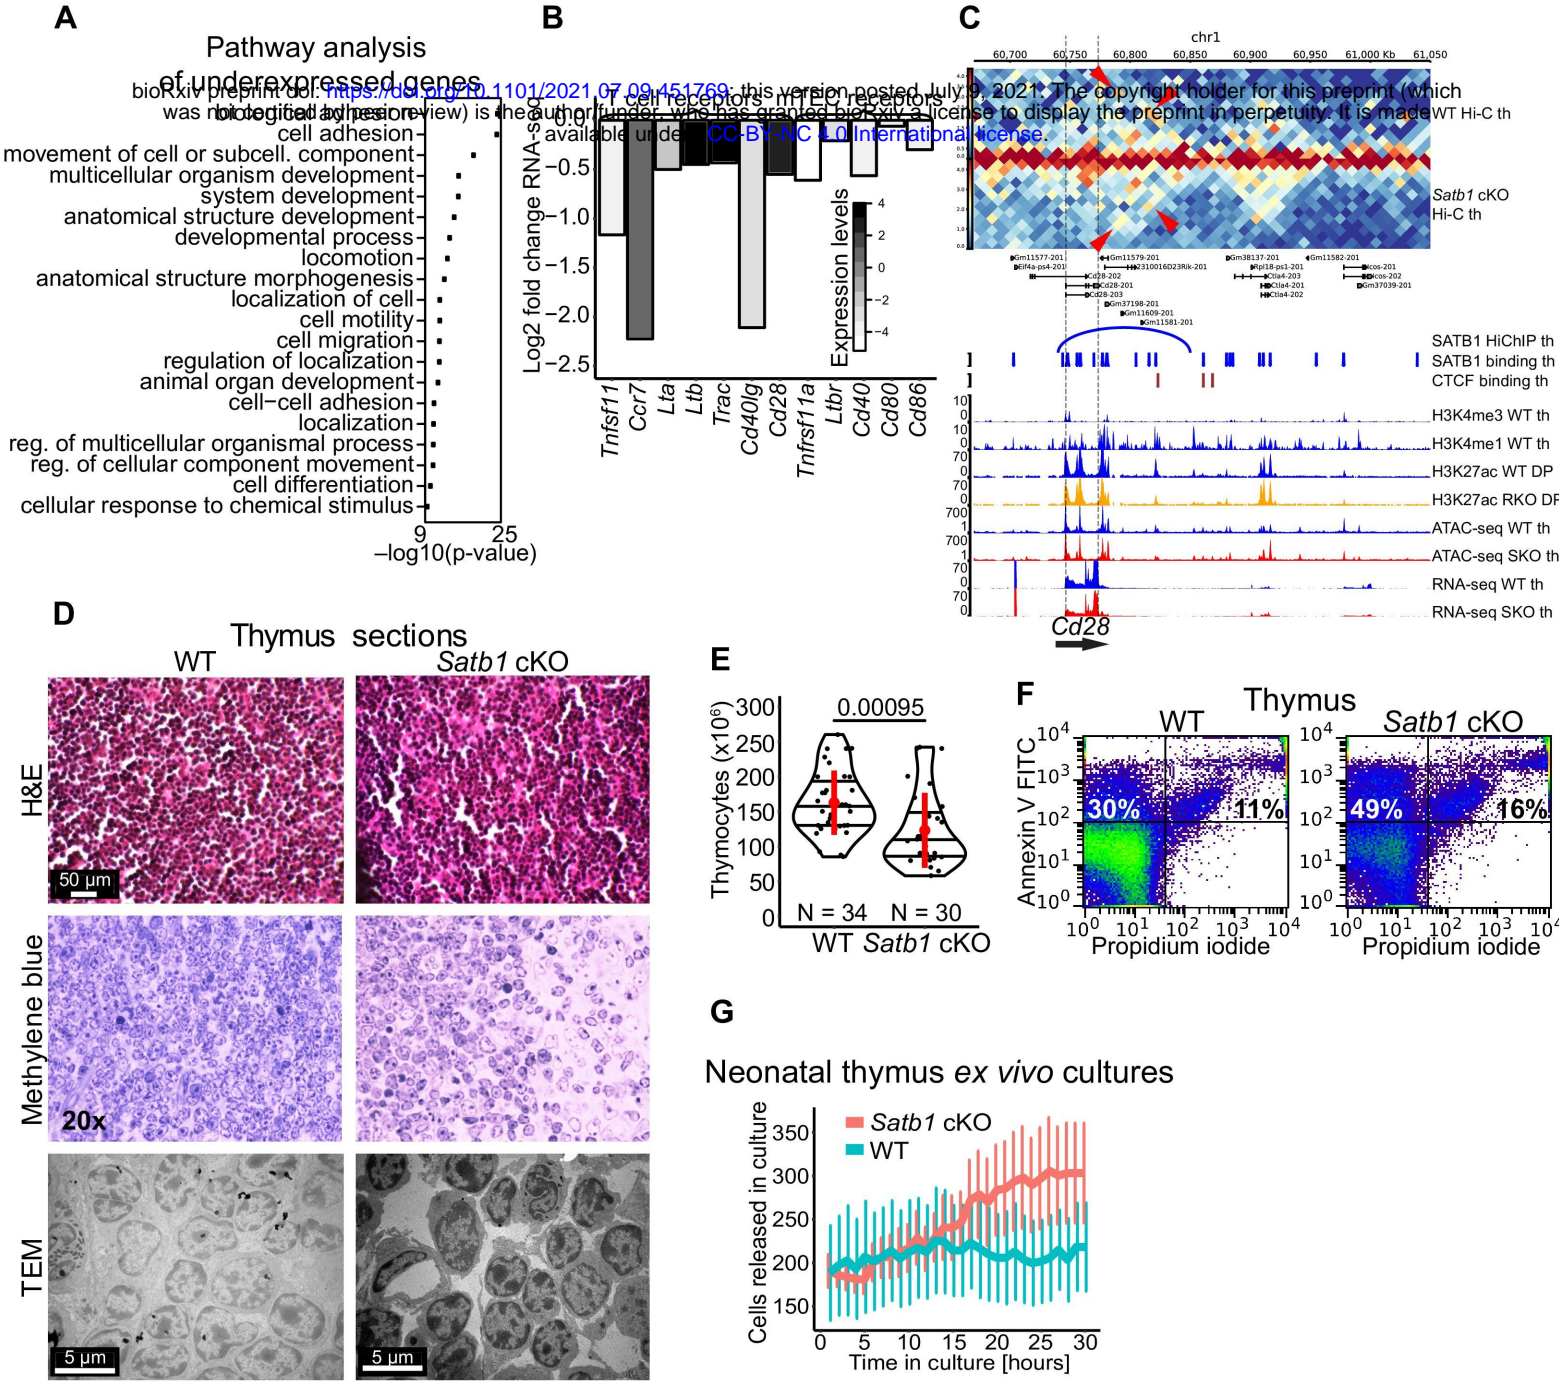

Source: https://biorxiv.org/content/10.1101/2021.07.09.451769v1.full.pdf
